1 **Semantic representations during language comprehension are affected by context**

2 Fatma Deniz<sup>\*a, b</sup>, Christine Tseng<sup>\*a</sup>, Leila Wehbe<sup>c</sup>, Tom Dupré la Tour<sup>a</sup>, Jack L. Gallant<sup>a, d</sup>

3

4 <sup>a</sup>Helen Wills Neuroscience Institute, University of California, Berkeley, CA 94720, USA

5 <sup>b</sup>Institute of Software Engineering and Theoretical Computer Science, Technische Universität Berlin,

6 Berlin, Germany

7 <sup>c</sup>Machine Learning Department, Carnegie Mellon University, Pittsburgh, PA 15213, USA

8 <sup>d</sup>Department of Psychology, University of California, Berkeley, CA 94720, USA

9 <sup>\*</sup>all authors contributed equally and are listed alphabetically

## 10 **Abstract**

11 The meaning of words in natural language depends crucially on context. However, most  
12 neuroimaging studies of word meaning use isolated words and isolated sentences with little context.  
13 Because the brain may process natural language differently from how it processes simplified stimuli,  
14 there is a pressing need to determine whether prior results on word meaning generalize to natural  
15 language. fMRI was used to record human brain activity while four subjects (two female) read words  
16 in four conditions that vary in context: narratives, isolated sentences, blocks of semantically similar  
17 words, and isolated words. We then compared the signal-to-noise ratio (SNR) of evoked brain  
18 responses, and we used a voxelwise encoding modeling approach to compare the representation of  
19 semantic information across the four conditions. We find four consistent effects of varying context.  
20 First, stimuli with more context evoke brain responses with higher SNR across bilateral visual,  
21 temporal, parietal, and prefrontal cortices compared to stimuli with little context. Second, increasing  
22 context increases the representation of semantic information across bilateral temporal, parietal, and  
23 prefrontal cortices at the group level. In individual subjects, only natural language stimuli consistently  
24 evoke widespread representation of semantic information. Third, context affects voxel semantic  
25 tuning. Finally, models estimated using stimuli with little context do not generalize well to natural  
26 language. These results show that context has large effects on the quality of neuroimaging data and  
27 on the representation of meaning in the brain. Thus, neuroimaging studies that use stimuli with little  
28 context may not generalize well to the natural regime.

## 29 **Significance Statement**

30 Context is an important part of understanding the meaning of natural language, but most  
31 neuroimaging studies of meaning use isolated words and isolated sentences with little context. Here  
32 we examined whether the results of neuroimaging studies that use out-of-context stimuli generalize to  
33 natural language. We find that increasing context improves the quality of neuroimaging data and  
34 changes where and how semantic information is represented in the brain. These results suggest that  
35 findings from studies using out-of-context stimuli may not generalize to natural language used in daily  
36 life.

## 37 **Introduction**

38 Language is our main means of communication and an integral part of daily life. Natural language  
39 comprehension requires extracting meaning from words that are embedded in context. However,  
40 most neuroimaging studies of word meaning use simplified stimuli consisting of isolated words or  
41 sentences (Price 2012). Natural language differs from isolated words and sentences in several ways.  
42 Natural language contains phonological and orthographic patterns, lexical semantics, syntactic  
43 structure, and compositional- and discourse-level semantics embedded in social context (Hagoort  
44 2019). In contrast, isolated words and sentences only contain a few of these components (e.g., lexical  
45 meaning, local syntactic structure). (For concision, this paper will refer to all differences between  
46 natural language and isolated words/sentences as differences in “context.”)

47

48 Neuroimaging studies that use isolated words and sentences implicitly assume that their results will  
49 generalize to natural language. However, because the brain is a highly nonlinear dynamical system  
50 (Wu, David, and Gallant 2006; Breakspear 2017), the representation of semantic information may  
51 change depending on context (Poeppel et al. 2012; Hagoort 2019; Hamilton and Huth 2020). Indeed,  
52 contextual effects have been demonstrated clearly in other domains. For example, many neurons in  
53 the visual system respond differently to simplified stimuli compared to naturalistic stimuli (Simoncelli  
54 and Olshausen 2001; Ringach, Hawken, and Shapley 2002; David, Vinje, and Gallant 2004; Touryan,  
55 Felsen, and Dan 2005). However, few studies have examined whether insights about semantic  
56 representation from studies using simplified stimuli will generalize to natural language.

57

58 Results from past studies suggest that context has a large effect on semantic representation. Several  
59 natural language studies from our lab reported that semantic information is represented in a large,  
60 distributed network of brain regions including bilateral temporal, parietal, and prefrontal cortices, and  
61 that semantic information is represented independently of the presentation modality (Huth et al. 2016;  
62 Deniz et al. 2019). In contrast, studies that used isolated words or sentences as stimuli independently



63 identified only a few brain regions that represent semantic information. These studies have separately  
64 identified angular gyrus, left inferior frontal gyrus (IFG), left ventromedial prefrontal cortex (vmPFC),  
65 left dorsolateral prefrontal cortex (dmPFC), anterior temporal lobe, lateral-, ventral-, and  
66 inferotemporal cortex, posterior cingulate gyrus, and posterior parietal cortex (for reviews see (Jeffrey  
67 R. Binder et al. 2009; Price 2010, 2012).

68

69 One way that context might affect neuroimaging results is by affecting the signal-to-noise ratio (SNR)  
70 of evoked brain responses (i.e., affecting the metabolic activity of the brain such that the repeatability  
71 of the recorded blood-oxygen-level-dependent (BOLD) response is affected). Although no language  
72 studies have explicitly looked at evoked BOLD SNR, several converging lines of evidence suggest  
73 that context does affect evoked SNR in language studies. (Lerner et al. 2011) examined how  
74 language context affects cross-subject correlations in brain responses, and they reported that as the  
75 amount of context increased, the number of voxels that were correlated across subjects also  
76 increased. These voxels were located in high-level brain regions including TPJ, precuneus, and  
77 mPFC. In contrast, voxel responses in sensory regions and the superior temporal sulcus (STS) were  
78 reliably correlated when stimuli with little context stimuli was presented to the subjects (also see  
79 (Hasson, Chen, and Honey 2015)). In addition, several contrast-based fMRI language studies  
80 reported that increasing context evoked larger and more widespread patterns of brain activity in  
81 posterior STS, TPJ, and mPFC (Mazoyer et al. 1993; Xu et al. 2005; Jobard et al. 2007). Finally, most  
82 subjects are more attentive when reading natural stories than when reading isolated words, and  
83 attention affects BOLD SNR (Bressler and Silver 2010).

84

85 Another more interesting way that context might affect neuroimaging results is by directly changing  
86 semantic representations in the brain (i.e., changing which voxels represent semantic information  
87 and/or the semantic tuning of those voxels). Context can change the way that subjects attend to  
88 semantic information, and semantic representations in many brain areas shift toward attended

89 semantic categories (Çukur et al. 2013; Sprague, Saproo, and Serences 2015; Nastase et al. 2017).  
90 Context also changes the statistical structure of language stimuli, and these statistical changes can  
91 affect cognitive processes and representations in a variety of ways (Wu, David, and Gallant 2006;  
92 Dahmen et al. 2010; Breakspear 2017).

93

94 To test the hypotheses that context affects evoked SNR and semantic representations, we used fMRI  
95 and a voxelwise encoding model approach to directly compare four stimulus conditions that vary in  
96 context: Narratives, Sentences, Semantic Blocks, and Single Words (Figure 1). The Narratives  
97 condition consisted of four narrative stories used in our previous studies (Huth et al. 2016; Deniz et al.  
98 2019; Popham et al. 2021). The other three conditions used sentences, blocks of semantically similar  
99 words, and individual words sampled from the narratives.

100

## 101 **Materials and Methods**

### 102 Experimental Design and Statistical Analysis

103 Subjects. Functional data were collected from two males and two females: S1 (male, age 31), S2  
104 (male, age 24), S3 (female, age 24), S4 (female, age 23). All subjects were healthy and had normal  
105 hearing, and normal or corrected-to-normal vision. All subjects were right handed according to the  
106 Edinburgh handedness inventory (Oldfield, 1971). Laterality scores were +70 (decile R.3) for S1, +95  
107 (decile R.9) for S2, +90 (decile R.7) for S3, +80 (decile R.5) for S4.

108

109 MRI data collection. MRI data were collected on a 3T Siemens TIM Trio scanner with a 32-channel  
110 Siemens volume coil, located at the UC Berkeley Brain Imaging Center. Functional scans were  
111 collected using gradient echo EPI with repetition time (TR) = 2.0045s, echo time (TE) = 31ms, flip  
112 angle = 70 degrees, voxel size = 2.24 x 2.24 x 4.1 mm (slice thickness = 3.5 mm with 18% slice gap),  
113 matrix size = 100 x 100, and field of view = 224 x 224 mm. Thirty axial slices were prescribed to cover  
114 the entire cortex and were scanned in interleaved order. A custom-modified bipolar water excitation

115 radiofrequency (RF) pulse was used to avoid signal from fat. Anatomical data were collected using a  
116 T1-weighted multi-echo MP-RAGE sequence on the same 3T scanner. Approximately 3.5 hours  
117 (214.85 minutes) of fMRI data was collected for each subject.

118

119 fMRI data pre-processing. The FMRIB Linear Image Registration Tool (FLIRT) from FSL 5.0 (M.  
120 Jenkinson and Smith 2001; Mark Jenkinson et al. 2002) was used to motion-correct each functional  
121 run. A high-quality template volume was then created for each run by averaging all volumes in the run  
122 across time. FLIRT was used to automatically align the template volume for each run to an overall  
123 template, which was chosen to be the temporal average of the first functional run for each subject.  
124 These automatic alignments were manually checked and adjusted as necessary to improve accuracy.  
125 The cross-run transformation matrix was then concatenated to the motion-correction transformation  
126 matrices obtained using MCFLIRT, and the concatenated transformation was used to resample the  
127 original data directly into the overall template space.

128

129 A 3rd order Savitsky-Golay filter with a 121-TR window was used to identify low-frequency voxel  
130 response drift. This drift was subtracted from the signal before further processing. Responses for  
131 each run were z-scored separately before voxelwise modeling. In addition, 10 TRs were discarded  
132 from the beginning and the end (20 TRs total) of each run.

133

134 Cortical surface reconstruction and visualization. Freesurfer (Dale, Fischl, and Sereno 1999) was  
135 used to generate cortical surface meshes from the T1-weighted anatomical scans. Before surface  
136 reconstruction, Blender and pycortex (<http://pycortex.org>; (Gao et al. 2015)) were used to carefully  
137 hand-check and correct anatomical surface segmentations. To aid in cortical flattening, Blender and  
138 pycortex were used to remove the surface crossing the corpus callosum and relaxation cuts were  
139 made into the surface of each hemisphere. The calcarine sulcus cut was made at the horizontal  
140 meridian in V1 as identified from retinotopic mapping data.

141

142 Pycortex (Gao et al. 2015) was used to align functional images to the cortical surface. The line-  
143 nearest scheme in pycortex was used to project functional data onto the surface for visualization and  
144 subsequent analysis. The line-nearest scheme samples the functional data at 64 evenly-spaced  
145 intervals between the inner (white matter) and outer (pial) surfaces of the cortex and averages the  
146 samples. Samples are taken using nearest-neighbor interpolation, in which each sample is given the  
147 value of its enclosing voxel.

148

149 Stimuli. Stimuli for all four conditions were generated from ten spoken stories from The Moth Radio  
150 Hour (used previously in (Huth et al. 2016)). In each story, a speaker tells an autobiographical story in  
151 front of a live audience. The ten selected stories are 10-15 min long, cover a wide range of topics,  
152 and are highly engaging. Transcriptions of these stories were used to generate the stimuli.

153

154 Story transcription. Each story was manually transcribed by one listener, and this transcription was  
155 checked by a second listener. Certain sounds (e.g., laughter, lip-smacking, and breathing) were also  
156 transcribed in order to improve the accuracy of the automated alignment. The audio of each story was  
157 downsampled to 11.5 kHz and the Penn Phonetics Lab Forced Aligner (P2FA; (Yuan and Liberman  
158 2008)) was used to automatically align the audio to the transcript. P2FA uses a phonetic hidden  
159 Markov model to find the temporal onset and offset of each word and phoneme. The Carnegie Mellon  
160 University pronouncing dictionary was used to guess the pronunciation of each word. The Arpabet  
161 phonetic notation was used when necessary to manually add words and word fragments that  
162 appeared in the transcript but not in the pronouncing dictionary.

163

164 After automatic alignment was complete, Praat (Boersman and Weenink 2014) was used to manually  
165 check and correct each aligned transcript. The corrected, aligned transcript was then spot-checked  
166 for accuracy by a different listener. Finally, Praat's TextGrid object was used to convert the aligned

167 transcripts into word representations. The word representation of each story is a list of pairs (W, t),  
168 where W is a word and t is the time in seconds.

169

170 Stimulus Conditions. To evaluate the effect of context on evoked SNR and semantic representation in  
171 the brain, four stimulus conditions with different amounts of context were created. These four  
172 conditions were Narratives, Sentences, Semantic Blocks, and Single Words.

173

174 The Narratives condition consisted of four narratives from The Moth Radio Hour ("undertheinfluence",  
175 "souls", "life", "wheretheressmoke"). These four narratives were chosen from the ten narratives used  
176 in (Huth et al. 2016). Each narrative was presented in a separate ~10-minute scanning run. One  
177 narrative ("wheretheressmoke") was used as the model validation stimulus, and it was presented  
178 twice for each subject.

179

180 The Sentences condition consisted of sentences randomly sampled from the ten narratives used in  
181 (Huth et al. 2016). Sentence boundaries were marked manually, resulting in 1450 sentences with a  
182 median sentence length of 13 words (min=5 words, max=40 words). Sentences were presented in  
183 four unique ~10-minute scanning runs. One run was used as the model validation stimulus, and it  
184 was presented twice for each subject.

185

186 The Semantic Blocks condition consisted of blocks of semantically clustered words from the ten  
187 narratives used in (Huth et al. 2016). The motivation for this condition was to mimic the timescale on  
188 which semantic topics change in natural language without including grammatical and syntactic  
189 components. The semantic word clusters were designed to elicit maximally different voxel responses.  
190 To create the clusters, each word was first transformed into its semantic model representation (see  
191 Voxelwise model fitting below). The semantic model representation for each word was then projected  
192 onto the first ten principal components of the semantic model weights estimated in (Huth et al. 2016).

193 Finally, the projections were clustered with k-means clustering (k=12) to create 12 word clusters.  
194 During each scanning run, subjects saw 12 different blocks of 114 words each. The words in each  
195 block were sampled from one of the word clusters, and eight different word clusters were sampled in  
196 each run. The frequency with which each cluster was sampled was matched to the frequency with  
197 which words from that cluster appeared in the ten narratives. Blocks were presented in four unique  
198 ~10-minute long runs. One run was used as the model validation stimulus, and it was presented twice  
199 for each subject.

200

201 The Single Words condition consisted of words randomly sampled without replacement from the ten  
202 narratives used in (Huth et al. 2016). There were 21743 appearances of 2868 unique words across  
203 the narratives, and each appearance was sampled uniformly. Words were presented in four unique  
204 10-minute scanning runs. One run was used as the model validation stimulus, and it was presented  
205 twice for each subject.

206

207 For the Sentences, Semantic Blocks, and Single Words conditions, text descriptions of auditory  
208 sounds (e.g., laughter and applause) in the ten narratives were removed. In addition, obvious  
209 transcription errors were removed from the list of narrative words for the Semantic Blocks and Single  
210 Words conditions. Words that did not make sense by themselves (e.g., “tai”, “chi”) were also  
211 removed. There were five such words: “tai”, “chi”, “deja”, “vu”, and “sub.”

212

213 Stimulus presentation. In all conditions, words were presented individually at the center of the screen  
214 using Rapid Serial Visual Presentation (RSVP) (Forster 1970; Buchweitz et al. 2009). Words in the  
215 Narratives and Sentences conditions were presented with the same timing and duration as in the  
216 original spoken stories. Words in the Semantic Blocks and Single Words conditions were presented  
217 for a baseline of 400 ms with an additional 10 ms for every character. For example, the word “apple”  
218 would be presented for  $400 \text{ ms} + 10 \text{ ms/character} * (5 \text{ characters}) = 450 \text{ ms}$ . The word presentation

219 timing was determined after extensive pilot testing before the experiment was run. The resulting  
220 parameters provided a good balance between readability and keeping subject engagement.  
221  
222 For subjects S1, S2, and S4, the four conditions were presented in 15 runs over two scanning  
223 sessions. Each condition was presented in a separate run, and the runs were interleaved in each  
224 session. In the first session, the conditions were presented in the order: Single Words, Semantic  
225 Blocks (validation stimulus), Sentences, Single Words (validation stimulus), Semantic Blocks,  
226 Sentences (validation stimulus), Semantic Blocks, Sentences. In the second session, the conditions  
227 were presented in the order: Sentences, Single Words (validation stimulus), Semantic Blocks, Single  
228 Words, Semantic Blocks (validation stimulus), Single Words, Sentences (validation stimulus).  
229 Conditions were presented in the same order for subjects S1, S2, and S4. For subject S3, the four  
230 conditions were presented in four scanning sessions. Each condition was presented in a separate  
231 scanning session, and each session contained 8 runs (including two repetitions of the validation  
232 stimulus). The stimuli used for this paper was a subset of the total stimuli presented in the four  
233 sessions. Although the stimuli were presented differently for subject S3, the results for subject S3 are  
234 consistent with the other three subjects.

235  
236 The pygame library in Python was used to display black text on a gray background at 34 horizontal  
237 and 27 vertical degrees of visual angle. Letters were presented at average 6 (min=1, max=16)  
238 horizontal and 3 vertical degrees of visual angle. A white fixation cross was present at the center of  
239 the display. Subjects were asked to fixate while reading the text. Eye movements were monitored at  
240 60 Hz throughout the scanning sessions using a custom-built camera system equipped with an  
241 infrared source (Avotec) and the ViewPoint EyeTracker software suite (Arrington Research). The eye  
242 tracker was calibrated before each session of data acquisition.

243  
244 Explainable variance (EV). To measure the functional SNR of each stimulus condition, we computed

245 the explainable variance (EV). EV was computed as the amount of variance in the response of a  
246 voxel that can be explained by the mean response of the voxel across multiple repetitions of the  
247 same stimulus. Formally, if the responses of a voxel to a repeated stimulus is expressed as a matrix  
248  $Y$  with dimensions (# of TRs in each repetition, # of stimulus repetitions), then EV is given by

$$249 \quad EV = EV' - [(1 - EV') / \# \text{ of stimulus repetitions} - 1],$$

$$250 \quad \text{where } EV' = 1 - [\text{variance}(Y - \text{mean}(Y, \text{axis}=1)) / \text{variance}(Y)].$$

251 Note that this is the same as the coefficient of determination ( $R^2$ ) where the model prediction is the  
252 mean response across stimulus repetitions. For each condition, EV was computed from the two  
253 repeated validation runs.

254

255 Voxelwise model fitting and validation. To identify voxels that represent semantic information, a  
256 linearized encoding model (Nishimoto et al. 2011; Huth et al. 2012, 2016) was fit to every cortical  
257 voxel in each subject's brain. The linearized encoding model consisted of one feature space designed  
258 to represent semantic information in the stimuli (the semantic feature space), and four feature spaces  
259 designed to represent low-level linguistic information in the stimuli. In the semantic feature space, the  
260 semantic content of each word was represented by the word's co-occurrence statistics with the 985  
261 words in Wikipedia's List of 1000 basic words (Huth et al., 2016). Thus, each word was represented  
262 by a 985-long vector in the semantic feature space. The co-occurrence statistics were computed over  
263 a large text corpus that included the ten narrative stories used in Huth et al. (2016), several books  
264 from Project Gutenberg, a wide variety of Wikipedia pages, and a broad selection of reddit.com user  
265 comments (Huth et al. 2016). The four low-level feature spaces were word rate (1 parameter),  
266 number of letters (1 parameter), letters (26 parameters), and word length variation per TR (1  
267 parameter). Together, the five feature spaces had 1014 features.

268

269 The features passed through three additional preprocessing steps before being fit to BOLD  
270 responses. First, to account for the hemodynamic response, a separate finite impulse response (FIR)



271 filter with four delays was fit for each of the 1014 features, resulting in 4056 final features. This was  
272 accomplished by concatenating copies of the features delayed by 1, 2, 3, and 4 TRs (approximately  
273 2, 4, 6, and 8 seconds). Taking the dot product of this concatenated feature space with a set of linear  
274 weights is functionally equivalent to convolving the undelayed features with a linear temporal kernel  
275 that has non-zero entries for 1-, 2-, 3-, and 4-time point delays. Second, 10 TRs were discarded from  
276 the beginning and the end (20 TRs total) of each run. Third, each feature was z-scored separately  
277 within each run. This was done so that the features would be on the same scale as the BOLD  
278 responses, which were also z-scored within each run.

279

280 A single joint model consisting of the 4056 features were fit to BOLD responses using banded ridge  
281 regression (Nunez-Elizalde, Huth, and Gallant 2019) and the himalaya Python package ((Dupré la  
282 Tour et al. 2022), see Code Accessibility). A separate model was fit for every voxel in every subject  
283 and condition. For every model, a regularization parameter was estimated for each of the five feature  
284 spaces using a random search. In the random search, 1000 normalized hyperparameter candidates  
285 were sampled from a Dirichlet distribution and scaled by 30 log-spaced values ranging from  $10^{-5}$  to  
286  $10^{20}$ . The best normalized hyperparameter candidate and scaling were selected for each feature  
287 space for each voxel. Finally, models were fit again on the BOLD responses with the selected  
288 hyperparameters.

289

290 To validate the models, estimated feature weights were used to predict responses to a separate,  
291 held-out validation dataset. Validation stimuli for the Narratives condition consisted of two repeated  
292 presentations of the narrative “wheretheressmoke” (Huth et al. 2016). Validation stimuli for the  
293 Sentences, Semantic Blocks, and Single Words conditions consisted of two repeated presentations of  
294 one run for each condition. Prediction accuracy was then computed by estimating the contribution of  
295 each feature space to the total prediction accuracy of the joint voxelwise model using the  
296 “correlation\_score\_split” function in the himalaya Python package (see also (St-Yves and Naselaris

297 2018), “Feature map contribution to the prediction accuracy”). This function computes the correlation  
298 between the predicted BOLD response from one feature space and the average BOLD response  
299 across the two validation runs, while accounting for the magnitude of the predictions from each  
300 feature space with respect to the other feature spaces in the joint model. The contribution from the  
301 semantic feature space is shown as semantic model prediction accuracy in Figures 4 and 5.

302

303 Statistical significance for each condition was computed with permutation testing. A null distribution  
304 was generated by permuting 10-TR blocks of the average validation BOLD response 5000 times and  
305 computing the prediction accuracy for each permutation (10 TRs were blocked to account for  
306 temporal autocorrelations in the BOLD signal). Resulting p values were corrected for multiple  
307 comparisons within each subject using the false discovery rate (FDR) procedure (Benjamini and  
308 Hochberg 1995).

309

310 Tuning shifts. To determine how semantic tuning changes between the Sentences and Narratives  
311 conditions, we looked at the difference between the estimated semantic model weights in the two  
312 conditions. First, temporal information was removed from the semantic model weights by averaging  
313 across the four delays for each semantic feature. Semantic model weights were then normalized by  
314 their L2-norm for each voxel, subject, and condition separately. This was done to ensure that the  
315 semantic model weights in both conditions are on the same numerical scale. Finally, the normalized  
316 semantic model weights estimated in the Sentences condition were subtracted from the normalized  
317 semantic model weights estimated in the Narratives condition.

318

319 To interpret the resulting difference vectors, we used principal components analysis (PCA) to recover  
320 a low-dimensional subspace. The difference vector for each voxel in each subject was scaled by the  
321 voxel’s minimum semantic model prediction accuracy between the Sentences and Narratives  
322 conditions. This was done to avoid including noise from voxels that were poorly predicted in either

323 condition. We then applied PCA to the scaled difference vectors, yielding 985 PCs per subject. Partial  
324 scree plots showing the proportion of variance explained by the PCs in each subject are shown in  
325 Extended Data Figure 8-1. We projected each subject's difference vectors onto the first three PCs for  
326 interpretation and visualization.

327

328 Cross-condition voxelwise model fitting. Estimated semantic model weights from the Single Words,  
329 Semantic Blocks and Sentences conditions were used to predict voxel responses in the Narratives  
330 condition. Prediction accuracy was computed as Pearson's correlation coefficient between the  
331 predicted BOLD response using semantic model weights from the Single Words, Semantic Blocks, or  
332 Sentences condition and the average BOLD response across the two validation runs in the Narratives  
333 condition. In addition, estimated semantic model weights from the Single Words and Semantic Blocks  
334 conditions were used to predict voxel responses in the Sentences condition. Prediction accuracy was  
335 computed as Pearson's correlation coefficient between the predicted BOLD response using semantic  
336 model weights from the Single Words or Semantic Blocks condition and the average BOLD response  
337 across the two validation runs in the Sentences condition.

338

339 All model fitting and analysis was performed using custom software written in Python, making heavy  
340 use of NumPy (Harris et al. 2020) and SciPy (Virtanen et al. 2020). Analysis and visualizations were  
341 developed using iPython (Perez and Granger 2007), the interactive programming and visualization  
342 environment jupyter notebook (Kluyver et al. 2016), Pycortex (Gao et al. 2015), and Matplotlib  
343 (Hunter 2007).

344

345 Code Accessibility. The himalaya package is publicly available on GitHub  
346 (<https://github.com/gallantlab/himalaya>).

347

## 348 **Results**

349 The goal of this study was to understand whether context affects evoked SNR and whether it affects  
350 semantic representations in the brain. Previous studies suggest that both evoked SNR and semantic  
351 representations will differ across the four experimental conditions (Single Words, Semantic Blocks,  
352 Sentences, and Narratives). Here, we analyzed evoked SNR and semantic representations for each  
353 of the four conditions in individual subjects.

354

355 To estimate evoked SNR, we computed the reliability of voxel responses across repetitions of the  
356 same stimulus. Several different sources of noise can influence the variability of voxel responses  
357 across stimulus repetitions: magnetic inhomogeneity, voxel response variability, and variability in  
358 subject attention or vigilance. Because these sources are independent across stimulus repetitions,  
359 pooling voxel responses across repetitions averages out the noise and provides a good estimate of  
360 the evoked SNR. In this study, we used explainable variance (EV) as a measure of reliability and  
361 computed the EV for two repetitions of one run in each condition to estimate evoked SNR (see  
362 Methods).

363

364 Figure 3 shows EV for the four conditions in one typical subject (S1) (see Extended Data Figure 3-1  
365 for voxels with significant EV; see Extended Data Figure 3-2 for unthresholded EV for subjects 2-4).  
366 In the Single Words condition, appreciable EV is only found in a few scattered voxels located in  
367 bilateral primary visual cortex, STS, and inferior frontal gyrus (IFG) (Figure 3a). The number of voxels  
368 with significant EV ( $p < 0.05$ , FDR-corrected) in the Single Words condition is 256, 1198, 0, and 0 for  
369 subjects 1-4, respectively. A similar pattern is seen in the Semantic Blocks condition, where  
370 appreciable EV is only found in a few scattered voxels located in bilateral primary visual cortex, STS,  
371 and IFG (Figure 3b). The number of voxels with significant EV ( $p < 0.05$ , FDR-corrected) in the  
372 Semantic Blocks condition is 324, 1613, 1201, and 0 for subjects 1-4, respectively. In contrast, both

373 the Sentences and Narratives conditions produce high EV in many voxels located in bilateral visual,  
374 parietal, temporal, and prefrontal cortices (Figures 3c and 3d). The number of voxels with significant  
375 EV ( $p < 0.05$ , FDR-corrected) in the Sentences condition is 4225, 11697, 2359, and 7251 for subjects  
376 1-4, respectively. The number of voxels with significant EV ( $p < 0.05$ , FDR-corrected) in the Narratives  
377 condition is 7622, 8062, 7059, and 2931 for subjects 1-4, respectively. Together, these results show  
378 that increasing context increases evoked SNR in bilateral visual, temporal, parietal, and prefrontal  
379 cortices.

380

381 To quantify semantic representation, we used a voxelwise encoding model (VM) procedure and a  
382 semantic feature space to identify voxels that represent semantic information in each condition  
383 (Figure 2). We first extracted semantic features and four types of low-level linguistic features from the  
384 stimulus words in each condition separately (see Methods). We then used banded ridge regression  
385 (Nunez-Elizalde, Huth, and Gallant 2019) to fit a joint encoding model for each voxel, subject, and  
386 condition. Finally, we split the joint model prediction accuracy across the five feature spaces to  
387 estimate the prediction accuracy for each feature space. Here we refer to voxels that had a significant  
388 semantic model prediction accuracy (see Methods) as “semantically selective voxels.”

389

390 Figure 4 shows semantic model prediction accuracy for semantically selective voxels for the four  
391 conditions in one typical subject (S1) (see Extended Data Figure 4-1 for additional subjects; see  
392 Extended Data Figure 4-2 for unthresholded semantic model prediction accuracy for all subjects). In  
393 the Single Words condition, no voxels are semantically selective in any of the four subjects (Figure 4a  
394 and Extended Data Figure 4-3,  $p < 0.05$ , FDR corrected). In the Semantic Blocks condition, scattered  
395 voxels along the left STS and left IFG are semantically selective (Figure 4b,  $p < 0.05$ , FDR corrected).  
396 The number of semantically selective voxels ( $p < 0.05$ , FDR corrected) in the Semantic Blocks  
397 condition is 708, 0, 0, and 0 for subjects 1-4, respectively (Extended Data Figure 4-3). In the  
398 Sentences condition, voxels in the left angular gyrus, left STG, bilateral STS, bilateral ventral

399 precuneus, bilateral ventral premotor speech area (sPMv), bilateral superior frontal sulcus (SFS), and  
400 left superior frontal gyrus (SFG) are semantically selective (Figure 4c,  $p < 0.05$ , FDR corrected). The  
401 number of semantically selective voxels ( $p < 0.05$ , FDR-corrected) in the Sentences condition is 1566,  
402 2581, 0, and 0 for subjects 1-4, respectively (Extended Data Figure 4-3). Finally, in the Narratives  
403 condition, voxels in bilateral angular gyrus, bilateral STS, bilateral STG, bilateral temporal parietal  
404 junction (TPJ), bilateral sPMv, bilateral ventral precuneus, bilateral SFS, bilateral SFG, bilateral IFG,  
405 left inferior parietal lobule (IPL), and left posterior cingulate gyrus are semantically selective (Figure  
406 4d,  $p < 0.05$ , FDR corrected). The number of semantically selective voxels ( $p < 0.05$ , FDR-corrected) in  
407 the Narratives condition is 4745, 7355, 7786, and 1757 for subjects 1-4, respectively (Extended Data  
408 Figure 4-3). Together, these results suggest that increasing context increases the representation of  
409 semantic information in bilateral temporal, parietal, and prefrontal cortices. These results also suggest  
410 that this effect is highly variable in individual subjects for non-natural language stimuli (Semantic  
411 Blocks, Sentences) but not for natural language stimuli (Narratives).

412

413 The results presented in Figure 4 were obtained in each subject's native brain space. To determine  
414 how the representation of semantic information varies across subjects for the four conditions, we  
415 transformed the semantic encoding model results obtained for each subject into the standard MNI  
416 brain space (Deniz et al. 2019). Figure 5 shows the mean unthresholded model prediction accuracy  
417 across subjects (Figure 5a-d) and the number of subjects for which each voxel is semantically  
418 selective (Figure 5e-h) for each condition. In the Single Words condition, no voxels are semantically  
419 selective in any of the four subjects (Figure 5a and 5e,  $p < 0.05$ , FDR corrected). In the Semantic  
420 Blocks condition, scattered voxels in left STS are semantically selective in two out of four subjects  
421 (Figure 5b and 5f,  $p < 0.05$ , FDR corrected). In the Sentences condition, voxels in the bilateral STS,  
422 left STG, bilateral ventral precuneus, bilateral angular gyrus, bilateral SFS, and bilateral premotor  
423 cortex are semantically selective in two out of four subjects (Figure 5c and 5g,  $p < 0.05$ , FDR  
424 corrected). Finally, in the Narratives condition, voxels in bilateral angular gyrus, bilateral STS, right

425 STG, right anterior temporal lobe, bilateral SFS and SFG, left IFG, left IPL, bilateral ventral  
426 precuneus, and bilateral posterior cingulate gyrus are semantically selective in all subjects (Figure 5d  
427 and 5h,  $p < 0.05$ , FDR corrected), and voxels in left STG and right IFG are semantically selective in  
428 three out of four subjects (Figure 5d and 5h,  $p < 0.05$ , FDR corrected). These results are consistent  
429 with those in Figure 4, and they suggest that increasing stimulus context increases the representation  
430 of semantic information across the cortical surface at the group level. In addition, this effect is  
431 inconsistent across individual subjects for non-natural stimuli (Semantic Blocks, Sentences) but not  
432 natural stimuli (Narratives).

433

434 Because the Narratives condition contains more contextual information than the other three  
435 conditions, we hypothesized that we would find more semantically selective voxels in the Narratives  
436 condition than in the other three conditions. To test this, we calculated the difference in the number of  
437 semantically selective voxels between the Narratives condition and each of the other three conditions.  
438 The difference between the Narratives and Single Words conditions is 4745, 7355, 7786, and 1757  
439 voxels for subjects 1-4, respectively ( $p < 0.05$  for all subjects). The difference between the Narratives  
440 and Semantic Blocks conditions is 4037, 7355, 7786, and 1757 voxels for subjects 1-4, respectively  
441 ( $p < 0.05$  for all subjects). Finally, the difference between the Narratives and Sentences conditions is  
442 3179, 4774, 7786, and 1757 voxels for subjects 1-4, respectively ( $p < 0.05$  for all subjects). The  
443 difference between the Narratives and Single Words conditions partly reflects the fact that most  
444 voxels have low evoked SNR in the Single Words condition and high evoked SNR in the Narratives  
445 condition (Figure 3). Because it is impossible to model noise, differences in evoked SNR across  
446 conditions directly affect the number of voxels that achieve a significant model fit. The difference  
447 between the Narratives and Semantic Blocks conditions also partly reflects differences in evoked  
448 SNR -- for most voxels, evoked SNR is low in the Semantic Blocks condition and high for the  
449 Narratives condition (Figure 3). In contrast, the evoked SNR is high for many voxels in both the  
450 Narratives and the Sentences conditions (Figure 3), so the difference in the number of semantically



451 selective voxels is unlikely to be due to differences in evoked SNR. Instead, this result suggests that  
452 semantic information is represented more widely across the cortical surface in the Narratives  
453 condition than in the Sentences condition.

454  
455 To determine which semantic concepts are represented in voxels that are semantically selective in  
456 the Narratives condition but not in the Sentences condition, we looked at the semantic tuning of such  
457 voxels. The semantic tuning of each voxel is given by its 985-dimensional vector of estimated  
458 semantic model weights, one weight for each of the 985 semantic model features (see Methods).  
459 Since the semantic model has 985 features, it is difficult and impractical to interpret the semantic  
460 tuning of a voxel by looking at each individual semantic feature directly. Instead, we projected each  
461 voxel's estimated semantic model weights into a low-dimensional subspace of the semantic model,  
462 and interpreted semantic tuning based on how the semantic weights projected into this subspace.  
463 This low-dimensional subspace was created by applying principal component analysis (PCA) to the  
464 aggregated estimated semantic model weights of seven subjects in Huth et al. 2016. Applying PCA to  
465 the aggregated semantic model weights returns principal components (PCs) that are ordered by how  
466 much variance they explain in the aggregated semantic model weights. The low-dimensional  
467 subspace was defined as the first three PCs of the aggregated semantic model weights.

468  
469 To visualize semantic tuning, we projected the estimated Narratives semantic model weights for each  
470 voxel onto the three PCs, and then we colored each voxel with an RGB color scheme. For each  
471 voxel, the red value indicates the projection onto the first PC, the green value indicates the projection  
472 onto the second PC, and the blue value indicates the projection onto the third PC. Figure 6 shows the  
473 estimated Narratives semantic model weights projected onto the three PCs for two subjects (S1 and  
474 S2, this analysis was not performed for S3 and S4 because they did not have any semantically  
475 selective voxels in the Sentences condition). In both subjects, most voxels that are semantically  
476 selective in the Narratives condition but not in the Sentences condition have either a high red value or  
477 a high green value. A high red value corresponds to tuning for concepts related to humans and social



478 relationships, and a high green value corresponds to tuning for concepts related to materials and  
479 measurements. Thus, voxels that are semantically selective in the Narratives condition but not in the  
480 Sentences condition are tuned to these two semantic categories.

481

482 Differences in semantic representation between the Sentences and Narratives conditions could be  
483 limited to a difference in the number of voxels recruited to represent semantic information in each  
484 condition. However, we hypothesized that differences in contextual information between the two  
485 conditions could also lead to differences in semantic tuning in the voxels that are semantically  
486 selective in both conditions. To test this hypothesis, the semantic model weights estimated in the  
487 Sentences condition were correlated with the semantic model weights estimated in the Narratives  
488 condition for voxels that are semantically selective in both conditions. Figure 7 shows Pearson's  
489 correlation coefficient between the semantic model weights estimated in the Sentences condition and  
490 the semantic model weights estimated in the Narratives condition mapped onto the cortical surface of  
491 two subjects (S1 and S2). In both subjects, semantic model weights for the Sentences and Narratives  
492 conditions are on average moderately correlated (S1 correlation min=-0.319, max=0.817,  
493 mean=0.344; S2 correlation min=-0.271, max=0.725, mean=0.316). This result shows that semantic  
494 tuning changes in semantically selective voxels between the Sentences and Narratives conditions.

495

496 To determine how semantic tuning changes between the Sentences and Narratives conditions, we  
497 looked at how estimated semantic model weights differ between the two conditions. For every voxel  
498 that is semantically selective in both conditions, we subtracted its semantic model weights estimated  
499 in the Sentences condition from its semantic model weights estimated in the Narratives condition (see  
500 Methods). The resulting semantic difference vector describes the semantic concept that changes  
501 between the voxel's semantic tuning in the Sentences and Narratives conditions. The difference  
502 vector resides in the same 985-dimensional semantic space as the semantic model weights, so we  
503 projected the difference vector into a low-dimensional semantic subspace to interpret its semantic

504 tuning. This subspace was created by applying PCA to the difference vectors for each subject  
505 separately. The first five PCs explained 47.1% of the variance in subject S1 and 48.2% of the  
506 variance in subject S2 (see Extended Data Figure 8-1 for partial scree plots), indicating that the  
507 semantic tuning shifts can be described by a relatively low number of dimensions. Figure 8 shows the  
508 projection of the difference vectors onto the first three PCs for one subject (S1; see Extended Data  
509 Figure 8-2 for subject S2). Each voxel is colored according to how positively (red) or negatively (blue)  
510 its difference vector projects onto each of the three PCs. For the first PC, voxels in bilateral STS and  
511 bilateral SFG have a strong positive projection while voxels in bilateral angular gyrus have a strong  
512 negative projection in both subjects. For the second PC, voxels in bilateral angular gyrus and superior  
513 STS have a strong positive projection in both subjects. No voxels have a strong negative projection in  
514 either subject. For the third PC, voxels in right STS have a strong positive projection in both subjects.  
515 No voxels have a strong negative projection in either subject. These results suggest that semantic  
516 tuning shifts between the Sentences and Narratives conditions are spatially organized across cortex.  
517  
518 To interpret the PCs of the semantic difference vectors, we looked at the words in the semantic model  
519 that were correlated with each PC (see Extended Data Figure 8-3 for the ten most correlated and  
520 least correlated words for each PC for each subject). For subject S1, the first PC is high on words  
521 related to interviewing and interrogation and low on words related to building and investing. The  
522 second PC is high on words related to packages and deliveries and low on words related to athletics.  
523 The third PC is high on words related to measurement and low on words related to family. For subject  
524 S2, the first PC is high on words related to visualization and low on words related to time and  
525 numbers. The second PC is high on words related to travel and deliveries and low on words related to  
526 body parts and actions. The third PC is high on function words and words related to numbers and low  
527 on informal words and interjections. The first three PCs for subject S1 are only moderately correlated  
528 to the first three PCs for subject S2: the correlation for the first PC is 0.3144, the correlation for the  
529 second PC is 0.5996, and the correlation for the third PC is 0.2351. This suggests that semantic

530 tuning shifts between the Sentences and Narratives conditions are subject-dependent. However,  
531 additional analysis using a larger subject pool is needed to determine the individual differences in  
532 semantic tuning.

533

534 So far we have shown that semantic information is represented more widely across the cortical  
535 surface in the Narratives condition compared to the Single Words, Semantic Blocks or Sentences  
536 conditions (Figures 4, 5, 6). Next, we wanted to assess whether semantic model weights estimated  
537 using stimuli with little context can generalize to natural stimuli. Due to the low evoked SNR and low  
538 semantic model predictions in the Single Words and Semantic Blocks conditions (Figure 3) (Extended  
539 Data Figure 4-2), we hypothesized that the semantic model weights estimated in these conditions  
540 would generalize more poorly to the Narratives condition than the Sentences condition. To examine  
541 this, we used the semantic model weights estimated in the conditions with less context than  
542 Narratives (Single Words, Semantic Blocks, or Sentences) to predict brain activity in the Narratives  
543 condition. We then compared these cross-condition predictions to within-condition predictions  
544 (Narratives predicting Narratives condition). Figure 9 shows the results of this analysis in subject S1  
545 (see Extended Data Figure 9-2 and Figure 9-3 for subject S2). Visual inspection of Figure 9 shows  
546 that when semantic model weights estimated in the Single Words condition are used to predict the  
547 Narratives condition only scattered voxels across the cerebral cortex are predicted (Figure 9a, blue  
548 voxels) but no voxel is predicted in the bilateral temporal, parietal, and prefrontal regions involved in  
549 within-condition predictions using Narratives (Figure 9a, red voxels). When semantic model weights  
550 estimated in the Semantic Blocks condition are used to predict the Narratives condition only scattered  
551 voxels across the cerebral cortex are predicted (Figure 9b, blue voxels). A few voxels in left STS are  
552 well predicted in cross-condition predictions (Semantic Blocks predicting Narratives) and in within-  
553 condition predictions using Narratives (Figure 9b, white voxels). Most of the remaining voxels within  
554 the bilateral temporal, parietal, and prefrontal regions are only well predicted in within-condition  
555 predictions using Narratives (Figure 9b, red voxels). In contrast, when semantic model weights

556 estimated in the Sentences condition are used to predict the Narratives condition voxels in bilateral  
557 angular gyrus, bilateral STS, bilateral TPJ, bilateral sPMv, bilateral ventral precuneus, bilateral SFG,  
558 bilateral IFG, and left SFS are well predicted in cross-condition predictions (Figure 9c white voxels;  
559 See Extended Data Figure 9-1 for significance,  $p < 0.05$ , FDR corrected). These voxels are also well  
560 predicted in within-condition predictions using Narratives (Figure 9c, white voxels). In addition, there  
561 are voxels within the bilateral temporal, parietal, and prefrontal regions that are only well predicted in  
562 within-condition predictions using Narratives. These voxels are located in left IPL, right SFS, bilateral  
563 STG, right anterior temporal lobe, and bilateral posterior cingulate gyrus (Figure 9c, red voxels).  
564 Scattered voxels located in bilateral precuneus, right IFG, and portions of SFS are not well predicted  
565 in within-condition predictions using Narratives but are well predicted in cross-condition predictions  
566 (Sentences predicting Narratives) (Figure 9c, blue voxels). These results show that stimuli with little  
567 context (Single Words or Semantic Blocks) do not generalize well to stimuli that has more context  
568 than isolated single words (Sentences or Narratives). In addition, estimated model weights using  
569 Sentences generalize well in some voxels within the temporal, parietal, and prefrontal regions.  
570 However, remaining voxels in these regions are only well predicted by a semantic model that is  
571 trained on natural stories stimuli (Narratives) than single isolated sentences (Sentences).

572  
573

## 574 **Discussion**

575 The aim of this study was to determine whether and how context affects semantic representations in  
576 the human brain. Our results show that both evoked SNR and semantic representations are affected  
577 by the amount of context in the stimulus. First, stimuli with relatively more context (Narratives,  
578 Sentences) evoke brain responses with higher SNR compared to stimuli with relatively less context  
579 (Semantic Blocks, Single Words) (Figure 3). Second, increasing the amount of context increases the  
580 representation of semantic information across the cortical surface at the group level (Figures 4, 5).  
581 However, in individual subjects, only the Narratives condition consistently increased the  
582 representation of semantic information compared to the Single Words condition (Figures 4, 5). Third,

583 increasing the amount of context changes the semantic tuning of semantically selective voxels across  
584 the cortical surface (Figures 6, 7, 8). These results strongly imply that neuroimaging studies that use  
585 isolated words or sentences do not fully map the functional brain representations that underlie natural  
586 language comprehension (Figure 9). By using the voxelwise encoding modeling approach with a  
587 specific semantic feature space, we demonstrate for the first time where semantic information is  
588 represented when different levels of contextual information are present in the stimuli. Thus, our  
589 results are much more specific to semantic representations than results in past studies.

590

591 Our observations that increasing context increases both the evoked SNR and the cortical  
592 representation of semantic information at the group level are fully consistent with results from  
593 previous neuroimaging studies. Several previous studies found that stimuli with more context evoke  
594 larger, more widespread patterns of brain activity (Mazoyer et al. 1993; Xu et al. 2005; Jobard et al.  
595 2007), that brain activity evoked for individual words is modulated by context (Just, Wang, and  
596 Cherkassky 2017), and that brain activity evoked by stimuli with more context are more reliable than  
597 those evoked by stimuli with less context (Lerner et al. 2011). Furthermore, previous studies that  
598 used narrative stimuli (Wehbe et al. 2014; Huth et al. 2016; Pereira et al. 2018; Deniz et al. 2019; Hsu  
599 et al. 2019; Popham et al. 2021) identified many more voxels involved in semantic processing than  
600 studies that used isolated words or sentences (for reviews see (Jeffrey R. Binder et al. 2009; Price  
601 2010, 2012).

602

603 Our results are also consistent with prior studies that have shown a broadly distributed semantic  
604 network that represents the meaning of language (Huth et al. 2016; Jeffrey R. Binder et al. 2009;  
605 Popham et al. 2021). One of the interesting aspects of the semantic network is that each semantic  
606 concept appears to be represented in multiple distinct brain areas. One potential hypothesis is that  
607 these repeated patterns actually represent different aspects of each of the semantic concepts, but  
608 they appear to be the same because of current limitations in our ability to measure and model brain

609 activity. If this is true, then one might expect that selectivity in this network would increase as a  
610 subject focuses on a concept for a longer period of time, or as increasing semantic context is  
611 provided.

612

613 However, there are several important differences between the results we reported here and those  
614 reported in previous neuroimaging studies. First, past studies that used isolated sentences found left  
615 IFG involved in semantic processing (Constable et al. 2004; Rodd, Davis, and Johnsrude 2005;  
616 Humphries et al. 2007). We found few semantically selective voxels scattered in left IFG in two out of  
617 four subjects in the Sentences condition (Figures 4 and 5). Second, past studies that used isolated  
618 words found bilateral STS, bilateral lateral sulcus, left IFG, left MTG, and left ITG involved in lexical  
619 processing (Mazoyer et al. 1993; Booth et al. 2002; Xu et al. 2005; Jobard et al. 2007; Lerner et al.  
620 2011). In contrast, we did not find any semantically selective voxels in the Single Words condition  
621 (Figures 4 and 5). Finally, one previous study looked at brain activity evoked by a stimulus  
622 conceptually similar to Semantic Blocks (Mollica et al. 2020). In the study, Mollica et al. (2020) used  
623 sentences that were scrambled such that nearby words could be combined into meaningful phrases.  
624 They found that the brain activity evoked by scrambled sentences was similar to the brain activity  
625 evoked by unscrambled sentences in left IFG, left middle frontal gyrus, left temporal lobe, and left  
626 angular gyrus. In contrast, we found voxels that were semantically selective in both the Semantic  
627 Blocks and Sentences conditions in left STS (Figures 4 and 5). We only found a few scattered voxels  
628 in IFG that were semantically selective in both of these conditions, and this result was not consistent  
629 across subjects (Figures 4-2 and 5). However, we also found that voxels in IFG were well predicted  
630 when the semantic model estimated in the Sentences condition was used to predict data in the  
631 Narratives condition (Figure 9 and Extended Data Figure 9-1). These two results suggest that IFG  
632 was involved in semantic processing when subjects read sentences (e.g. Sentences and Narratives  
633 conditions) and not when subjects read words that were semantically in context but were shown in no  
634 particular word order to the subjects (e.g. in the Semantic Blocks condition).

635

636 The inconsistencies between this study and past studies most likely stem from five major  
637 methodological differences between this study and those earlier studies. First, we avoided smoothing  
638 our data before performing analyses. We performed our analyses for each subject in their native brain  
639 space, and we did not perform any spatial smoothing across voxels. In contrast, most previous  
640 studies performed normalization procedures to transform their data into a standard brain space and  
641 applied a spatial smoothing operation across voxels (Lindquist 2008; Carp 2012). Spatial smoothing  
642 and normalization procedures can incorrectly assign signal to voxels and average away meaningful  
643 signal and individual variability in language processing (Steinmetz and Seitz 1991; Fedorenko and  
644 Kanwisher 2009; Fedorenko, Duncan, and Kanwisher 2012; Huth et al. 2016; Deniz et al. 2019).  
645 Thus, brain regions identified by past studies may be more relevant at the group level than in  
646 individual subjects. These smoothing procedures likely contribute to the inconsistencies observed  
647 between past studies and this study.

648

649 Second, we used an explicit computational model to identify semantically selective voxels. In  
650 contrast, most previous studies identified semantic brain regions by contrasting different experimental  
651 conditions (Jeffrey R. Binder et al. 2008, 2009; Price 2012). Although past studies designed their  
652 experimental conditions to isolate brain activity involved in semantic processing (Jeffrey R. Binder et  
653 al. 2008, 2009), there could be unexpected differences unrelated to semantic processing between the  
654 conditions. For example, experiments that contrast a semantic task with a phonological task (Jeffrey  
655 R. Binder et al. 2008, 2009) may have task difficulty as a confound. As a result, it is possible that  
656 some semantic brain areas identified by past studies are actually involved in processing the  
657 unexpected differences rather than semantics. We would likely not have identified such brain areas in  
658 this study, since our semantic model only contains information about semantics.

659

660 Third, we evaluated semantic model prediction accuracy on a separate, held-out validation dataset. In



661 contrast, most previous studies drew inferences from analyses performed on only one dataset without  
662 a validation dataset (Jeffrey R. Binder et al. 2009). Performing analyses on only one dataset can lead  
663 to inflated results that are overfit to the dataset (Soch, Haynes, and Allefeld 2016). Thus, some  
664 semantic brain areas identified by past studies may only be relevant for the specific stimuli,  
665 experimental design, or data used in those studies. Such study-specific brain areas would not  
666 generalize to other studies, such as this study.

667

668 Fourth, we collected a relatively large amount of fMRI data per subject from four subjects. In contrast,  
669 most previous studies collected a small amount of fMRI data per subject from many (15-30) subjects.  
670 Because fMRI data is noisy, most previous studies either averaged their data across subjects and/or  
671 smoothed their data to observe the effects of interest. However, as discussed earlier, smoothing and  
672 averaging fMRI data can lead to incomplete conclusions about language processing in the brain  
673 (Steinmetz and Seitz, 1991; Fedorenko and Kanwisher, 2009; Fedorenko et al., 2012; Huth et al.,  
674 2016; Deniz et al., 2019). In this study, we avoided averaging across subjects and smoothing  
675 procedures by collecting a relatively large amount of data per subject. Moreover, each subject  
676 provided a complete replication of all analyses because each subject had their own model fitting and  
677 validation data. Thus, even though there are fewer subjects in this study than in previous studies, it is  
678 likely that our findings will generalize to new subjects.

679

680 Finally, subjects in our study passively read the stimulus words, which allowed us to directly compare  
681 the Narratives condition with the other three conditions. In contrast, many past studies of semantic  
682 processing used active tasks involving lexical decisions (J. R. Binder et al. 2003), matching  
683 (Vandenberghe et al. 1996), or monitoring (Démonet et al. 1992). Active tasks are thought to increase  
684 subject engagement, which can increase evoked BOLD SNR. Thus, if we had used an active task,  
685 the effect of context on evoked SNR might have been even larger than the differences that we report  
686 here. In addition, different active tasks can affect semantic processing differently in the brain (Toneva



687 et al. 2020). Therefore, task effects likely contributed to the inconsistencies observed between past  
688 studies and this study.

689

690 To our knowledge, no previous language neuroimaging studies have looked at whether stimulus  
691 context affects semantic tuning. One interesting aspect of our results is that the semantic tuning shifts  
692 are different for subjects S1 and S2. One potential explanation for the discrepancy across subjects  
693 could be noise. Another possible explanation is that since both subjects saw the same stimuli in the  
694 Sentences and Narratives conditions, the difference in tuning shifts could be due to individual  
695 differences in attention rather than differences in the stimuli. In the absence of narrative structure  
696 subjects likely attend to different parts in a sentence, whereas when there is narrative structure  
697 subjects likely attend to similar semantic categories lead by the general narrative arc. This  
698 explanation is consistent with a previous study from our lab showing that many voxels across cortex  
699 shift their tuning towards attended semantic categories (Çukur et al. 2013). However, further research  
700 needs to be conducted about context-dependent semantic tuning shifts during language  
701 comprehension.

702

703 Many language neuroimaging studies use isolated sentences to localize the language network (e.g.,  
704 (Fedorenko et al. 2010; Scott, Gallée, and Fedorenko 2017; Wilson et al. 2017)). These localizers  
705 contrast isolated sentences with non-words (i.e., sentences > non-words) to identify regions of  
706 interest (ROIs) in the brain involved in language processing. The identified ROIs often include left  
707 IFG, left middle frontal gyrus, left temporal lobe, left angular gyrus, and right temporal lobe.  
708 Consistent with these localizers, many voxels in the listed ROIs have high EV in the Sentences  
709 condition. In fact, the raw EV value in the Sentences condition is higher than the raw EV value in the  
710 Narratives condition in many voxels, suggesting that the Sentences condition engages the language  
711 network more than the Narratives condition. More predictable stimuli could lead to less activation the  
712 second time the subject reads the stimuli that would lead to lower EV. In addition, we find fewer

713 semantically selective voxels in the Sentences condition than in the Narratives condition in all  
714 subjects (Figure 4 and Figure 5). Instead, we find that out of the five feature spaces we used in this  
715 study, the “number of letters” feature space has the highest prediction accuracy in the Sentences  
716 condition in all subjects. This suggests that a substantial portion of brain activations evoked by  
717 isolated sentences reflects the effect of low level features. However, the variance in the Sentences  
718 condition could also be explained by a different feature space that we did not include in our analyses  
719 for this paper.

720

721 Our study used a semantic model to determine whether and how semantic representations change  
722 across the four conditions. Although our semantic model is able to capture the semantic properties of  
723 individual words, it nonetheless has some limitations. First, because this model likely captures some  
724 narrative information that is correlated with word-level semantic information, some of the brain activity  
725 predicted by our semantic model may therefore reflect higher-level linguistic or domain-general  
726 representations (Fedorenko, Duncan, and Kanwisher 2012; Blank and Fedorenko 2017). Second, our  
727 semantic model has one static embedding for each word, and it does not differentiate between  
728 different word senses or different contexts in which a word may appear. Therefore, our semantic  
729 model may not predict voxel activity as well as other models that integrate contextual semantic  
730 information differently (Toneva and Wehbe 2019; Jain and Huth 2018; Heilbron et al. 2022; Schmitt et  
731 al. 2021; Goldstein et al. 2022; Schrimpf et al. 2021), specifically in the Sentences and Narratives  
732 conditions. The voxelwise modeling framework provides a straightforward method for evaluating  
733 alternative semantic models directly by construction of appropriate feature spaces. Therefore, a  
734 valuable direction for future research would be to examine other semantic models, and to include  
735 language models that explicitly account for factors such as contextual information, narrative structure,  
736 metaphor, and humor.

737

738 In conclusion, our results show that increasing the amount of stimulus context increases the SNR of

739 evoked brain responses, increases the representation of semantic information in the brain, and  
740 affects the semantic tuning of semantically selective voxels. These results imply that neuroimaging  
741 studies that use isolated words or sentences to study semantic processing or to localize the language  
742 network (Fedorenko et al. 2010) may provide a misleading picture of semantic language  
743 comprehension in daily life. Although natural language stimuli are much more complex than isolated  
744 words and sentences, the development and validation of the voxelwise encoding model framework for  
745 language processing (Huth et al. 2016; de Heer et al. 2017; Deniz et al. 2019; Popham et al. 2021)  
746 has made it possible to rigorously test hypotheses about semantic processing with natural language  
747 stimuli. To ensure that the results of neuroimaging study generalize to natural language processing,  
748 we suggest that future studies of semantic processing should use more naturalistic stimuli.

749

750

## 751 **References**

- 752 Benjamini, Yoav, and Yoel Hochberg. 1995. "Controlling the False Discovery Rate: A Practical and  
753 Powerful Approach to Multiple Testing." *Journal of the Royal Statistical Society. Series B,*  
754 *Statistical Methodology* 57 (1): 289–300.
- 755 Binder, J. R., K. A. McKiernan, M. E. Parsons, C. F. Westbury, E. T. Possing, J. N. Kaufman, and L.  
756 Buchanan. 2003. "Neural Correlates of Lexical Access during Visual Word Recognition." *Journal of Cognitive Neuroscience* 15 (3): 372–93.
- 757 Binder, Jeffrey R., Rutvik H. Desai, William W. Graves, and Lisa L. Conant. 2009. "Where Is the  
758 Semantic System? A Critical Review and Meta-Analysis of 120 Functional Neuroimaging  
759 Studies." *Cerebral Cortex* 19 (12): 2767–96.
- 760 Binder, Jeffrey R., Sara J. Swanson, Thomas A. Hammeke, and David S. Sabsevitz. 2008. "A  
761 Comparison of Five fMRI Protocols for Mapping Speech Comprehension Systems." *Epilepsia*  
762 49 (12): 1980–97.
- 763 Blank, Idan, and Evelina Fedorenko. 2017. "Domain-General Brain Regions Do Not Track Linguistic  
764 Input as Closely as Language-Selective Regions." *The Journal of Neuroscience: The Official*  
765 *Journal of the Society for Neuroscience*, September, 3642–3616.
- 766 Boersman, P., and D. Weenink. 2014. "Praat: Doing Phonetics by Computer (Version 5.3. 56)." *Amsterdam: Praat*. [https://scholar.google.ca/scholar?cluster=330790021926508991&hl=en&as\\_sdt=0,5&scioldt=0,5](https://scholar.google.ca/scholar?cluster=330790021926508991&hl=en&as_sdt=0,5&scioldt=0,5).
- 767 Booth, James R., Douglas D. Burman, Joel R. Meyer, Darren R. Gitelman, Todd B. Parrish, and M.  
768 Marsel Mesulam. 2002. "Modality Independence of Word Comprehension." *Human Brain*  
769 *Mapping* 16 (4): 251–61.
- 770 Breakspear, Michael. 2017. "Dynamic Models of Large-Scale Brain Activity." *Nature Neuroscience* 20  
771 (3): 340–52.
- 772 Bressler, David W., and Michael A. Silver. 2010. "Spatial Attention Improves Reliability of fMRI  
773 Retinotopic Mapping Signals in Occipital and Parietal Cortex." *NeuroImage* 53 (2): 526–33.
- 774 Buchweitz, Augusto, Robert A. Mason, Lêda M. B. Tomitch, and Marcel Adam Just. 2009. "Brain

- 778       Activation for Reading and Listening Comprehension: An fMRI Study of Modality Effects and  
779       Individual Differences in Language Comprehension.” *Psychology & Neuroscience* 2 (2): 111–  
780       23.
- 781   Carp, Joshua. 2012. “The Secret Lives of Experiments: Methods Reporting in the fMRI Literature.”  
782       *NeuroImage* 63 (1): 289–300.
- 783   Constable, R. Todd, Kenneth R. Pugh, Ella Berroya, W. Einar Mencl, Michael Westerveld, Weijia Ni,  
784       and Donald Shankweiler. 2004. “Sentence Complexity and Input Modality Effects in Sentence  
785       Comprehension: An fMRI Study.” *NeuroImage* 22 (1): 11–21.
- 786   Çukur, Tolga, Shinji Nishimoto, Alexander G. Huth, and Jack L. Gallant. 2013. “Attention during  
787       Natural Vision Warps Semantic Representation across the Human Brain.” *Nature*  
788       *Neuroscience* 16 (April): 763.
- 789   Dahmen, Johannes C., Peter Keating, Fernando R. Nodal, Andreas L. Schulz, and Andrew J. King.  
790       2010. “Adaptation to Stimulus Statistics in the Perception and Neural Representation of  
791       Auditory Space.” *Neuron* 66 (6): 937–48.
- 792   Dale, A. M., B. Fischl, and M. I. Sereno. 1999. “Cortical Surface-Based Analysis. I. Segmentation and  
793       Surface Reconstruction.” *NeuroImage* 9 (2): 179–94.
- 794   David, Stephen V., William E. Vinje, and Jack L. Gallant. 2004. “Natural Stimulus Statistics Alter the  
795       Receptive Field Structure of v1 Neurons.” *The Journal of Neuroscience: The Official Journal of*  
796       *the Society for Neuroscience* 24 (31): 6991–7006.
- 797   Démonet, J. F., F. Chollet, S. Ramsay, D. Cardebat, J. L. Nespoulous, R. Wise, A. Rascol, and R.  
798       Frackowiak. 1992. “The Anatomy of Phonological and Semantic Processing in Normal  
799       Subjects.” *Brain: A Journal of Neurology* 115 (6): 1753–68.
- 800   Deniz, Fatma, Anwar O. Nunez-Elizalde, Alexander G. Huth, and Jack L. Gallant. 2019. “The  
801       Representation of Semantic Information Across Human Cerebral Cortex During Listening  
802       Versus Reading Is Invariant to Stimulus Modality.” *The Journal of Neuroscience*.  
803       <https://doi.org/10.1523/jneurosci.0675-19.2019>.
- 804   Dupré la Tour, Tom, Michael Eickenberg, Anwar O. Nunez-Elizalde, and Jack L. Gallant. 2022.  
805       “Feature-Space Selection with Banded Ridge Regression.” *NeuroImage* 264 (December):  
806       119728.
- 807   Fedorenko, Evelina, John Duncan, and Nancy Kanwisher. 2012. “Language-Selective and Domain-  
808       General Regions Lie Side by Side within Broca’s Area.” *Current Biology: CB* 22 (21): 2059–62.
- 809   Fedorenko, Evelina, Po-Jang Hsieh, Alfonso Nieto-Castañón, Susan Whitfield-Gabrieli, and Nancy  
810       Kanwisher. 2010. “New Method for fMRI Investigations of Language: Defining ROIs  
811       Functionally in Individual Subjects.” *Journal of Neurophysiology* 104 (2).  
812       <http://jn.physiology.org/content/104/2/1177.figures-only>.
- 813   Fedorenko, Evelina, and Nancy Kanwisher. 2009. “Neuroimaging of Language: Why Hasn’t a Clearer  
814       Picture Emerged?” *Language and Linguistics Compass* 3 (4): 839–65.
- 815   Forster, Kenneth I. 1970. “Visual Perception of Rapidly Presented Word Sequences of Varying  
816       Complexity.” *Perception & Psychophysics* 8 (4): 215–21.
- 817   Gao, James S., Alexander G. Huth, Mark D. Lescroart, and Jack L. Gallant. 2015. “Pycortex: An  
818       Interactive Surface Visualizer for fMRI.” *Frontiers in Neuroinformatics* 9 (September): 23.
- 819   Goldstein, Ariel, Zaid Zada, Eliav Buchnik, Mariano Schain, Amy Price, Bobbi Aubrey, Samuel A.  
820       Nastase, et al. 2022. “Shared Computational Principles for Language Processing in Humans  
821       and Deep Language Models.” *Nature Neuroscience* 25 (3): 369–80.
- 822   Hagoort, Peter. 2019. “The Neurobiology of Language beyond Single-Word Processing.” *Science* 366  
823       (6461): 55–58.
- 824   Hamilton, Liberty S., and Alexander G. Huth. 2020. “The Revolution Will Not Be Controlled: Natural  
825       Stimuli in Speech Neuroscience.” *Language, Cognition and Neuroscience* 35 (5): 573–82.
- 826   Harris, Charles R., K. Jarrod Millman, Stéfan J. van der Walt, Ralf Gommers, Pauli Virtanen, David  
827       Cournapeau, Eric Wieser, et al. 2020. “Array Programming with NumPy.” *Nature* 585 (7825):  
828       357–62.
- 829   Hasson, Uri, Janice Chen, and Christopher J. Honey. 2015. “Hierarchical Process Memory: Memory

- 830 as an Integral Component of Information Processing.” *Trends in Cognitive Sciences* 19 (6):  
831 304–13.
- 832 Heer, Wendy A. de, Alexander G. Huth, Thomas L. Griffiths, Jack L. Gallant, and Frédéric E.  
833 Theunissen. 2017. “The Hierarchical Cortical Organization of Human Speech Processing.” *The*  
834 *Journal of Neuroscience: The Official Journal of the Society for Neuroscience* 37 (27): 6539–  
835 57.
- 836 Heilbron, Micha, Kristijan Armeni, Jan-Mathijs Schoffelen, Peter Hagoort, and Floris P. de Lange.  
837 2022. “A Hierarchy of Linguistic Predictions during Natural Language Comprehension.”  
838 *Proceedings of the National Academy of Sciences of the United States of America* 119 (32):  
839 e2201968119.
- 840 Hsu, Chun-Ting, Roy Clariana, Benjamin Schloss, and Ping Li. 2019. “Neurocognitive Signatures of  
841 Naturalistic Reading of Scientific Texts: A Fixation-Related fMRI Study.” *Scientific Reports* 9  
842 (1): 1–16.
- 843 Humphries, Colin, Jeffrey R. Binder, David A. Medler, and Einat Liebenthal. 2007. “Time Course of  
844 Semantic Processes during Sentence Comprehension: An fMRI Study.” *NeuroImage* 36 (3):  
845 924–32.
- 846 Hunter. 2007. “Matplotlib: A 2D Graphics Environment” 9 (May): 90–95.
- 847 Huth, Alexander G., Wendy A. de Heer, Thomas L. Griffiths, Frédéric E. Theunissen, and Jack L.  
848 Gallant. 2016. “Natural Speech Reveals the Semantic Maps That Tile Human Cerebral  
849 Cortex.” *Nature* 532 (7600): 453–58.
- 850 Huth, Alexander G., Shinji Nishimoto, An T. Vu, and Jack L. Gallant. 2012. “A Continuous Semantic  
851 Space Describes the Representation of Thousands of Object and Action Categories across the  
852 Human Brain.” *Neuron* 76 (6): 1210–24.
- 853 Jain, Shailee, and Alexander G. Huth. 2018. “Incorporating Context into Language Encoding Models  
854 for fMRI.” *BioRxiv*. <https://doi.org/10.1101/327601>.
- 855 Jenkinson, M., and S. Smith. 2001. “A Global Optimisation Method for Robust Affine Registration of  
856 Brain Images.” *Medical Image Analysis* 5 (2): 143–56.
- 857 Jenkinson, Mark, Peter Bannister, Michael Brady, and Stephen Smith. 2002. “Improved Optimization  
858 for the Robust and Accurate Linear Registration and Motion Correction of Brain Images.”  
859 *NeuroImage* 17 (2): 825–41.
- 860 Jobard, G., M. Vigneau, B. Mazoyer, and N. Tzourio-Mazoyer. 2007. “Impact of Modality and  
861 Linguistic Complexity during Reading and Listening Tasks.” *NeuroImage* 34 (2): 784–800.
- 862 Just, Marcel Adam, Jing Wang, and Vladimir L. Cherkassky. 2017. “Neural Representations of the  
863 Concepts in Simple Sentences: Concept Activation Prediction and Context Effects.”  
864 *NeuroImage* 157 (August): 511–20.
- 865 Kluyver, T., B. Ragan-Kelley, Fernando Pérez, B. Granger, Matthias Bussonnier, J. Frederic, Kyle  
866 Kelley, et al. 2016. “Jupyter Notebooks - a Publishing Format for Reproducible Computational  
867 Workflows.” <https://doi.org/10.3233/978-1-61499-649-1-87>.
- 868 Lerner, Yulia, Christopher J. Honey, Lauren J. Silbert, and Uri Hasson. 2011. “Topographic Mapping  
869 of a Hierarchy of Temporal Receptive Windows Using a Narrated Story.” *The Journal of*  
870 *Neuroscience: The Official Journal of the Society for Neuroscience* 31 (8): 2906–15.
- 871 Lindquist, Martin A. 2008. “The Statistical Analysis of fMRI Data.” *Statistical Science: A Review*  
872 *Journal of the Institute of Mathematical Statistics* 23 (4): 439–64.
- 873 Mazoyer, B. M., N. Tzourio, V. Frak, A. Syrota, N. Murayama, O. Levrier, G. Salamon, S. Dehaene, L.  
874 Cohen, and J. Mehler. 1993. “The Cortical Representation of Speech.” *Journal of Cognitive*  
875 *Neuroscience* 5 (4): 467–79.
- 876 Mollica, Francis, Matthew Siegelman, Evgeniia Diachek, Steven T. Piantadosi, Zachary Mineroff,  
877 Richard Futrell, Hope Kean, Peng Qian, and Evelina Fedorenko. 2020. “Composition Is the  
878 Core Driver of the Language-Selective Network.” *Neurobiology of Language* 1 (1): 104–34.
- 879 Nastase, Samuel A., Andrew C. Connolly, Nikolaas N. Oosterhof, Yaroslav O. Halchenko, J. Swaroop  
880 Guntupalli, Matteo Visconti di Oleggio Castello, Jason Gors, M. Ida Gobbini, and James V.  
881 Haxby. 2017. “Attention Selectively Reshapes the Geometry of Distributed Semantic



- 882 Representation.” *Cerebral Cortex* 27 (8): 4277–91.
- 883 Nishimoto, Shinji, An T. Vu, Thomas Naselaris, Yuval Benjamini, Bin Yu, and Jack L. Gallant. 2011.
- 884 “Reconstructing Visual Experiences from Brain Activity Evoked by Natural Movies.” *Current*
- 885 *Biology: CB* 21 (19): 1641–46.
- 886 Nunez-Elizalde, Anwar O., Alexander G. Huth, and Jack L. Gallant. 2019. “Voxelwise Encoding
- 887 Models with Non-Spherical Multivariate Normal Priors.” *NeuroImage* 197 (August): 482–92.
- 888 Pereira, Francisco, Bin Lou, Brianna Pritchett, Samuel Ritter, Samuel J. Gershman, Nancy
- 889 Kanwisher, Matthew Botvinick, and Evelina Fedorenko. 2018. “Toward a Universal Decoder of
- 890 Linguistic Meaning from Brain Activation.” *Nature Communications* 9 (1): 1–13.
- 891 Perez, Fernando, and Brian E. Granger. 2007. “IPython: A System for Interactive Scientific
- 892 Computing.” *Computing in Science and Engg.* 9 (3): 21–29.
- 893 Poeppel, David, Karen Emmorey, Gregory Hickok, and Liina Pykkänen. 2012. “Towards a New
- 894 Neurobiology of Language.” *The Journal of Neuroscience: The Official Journal of the Society*
- 895 *for Neuroscience* 32 (41): 14125–31.
- 896 Popham, Sara F., Alexander G. Huth, Natalia Y. Bilenko, Fatma Deniz, James S. Gao, Anwar O.
- 897 Nunez-Elizalde, and Jack L. Gallant. 2021. “Visual and Linguistic Semantic Representations
- 898 Are Aligned at the Border of Human Visual Cortex.” *Nature Neuroscience* 24 (11): 1628–36.
- 899 Price, Cathy J. 2010. “The Anatomy of Language: A Review of 100 fMRI Studies Published in 2009.”
- 900 *Annals of the New York Academy of Sciences* 1191 (March): 62–88.
- 901 ———. 2012. “A Review and Synthesis of the First 20years of PET and fMRI Studies of Heard
- 902 Speech, Spoken Language and Reading.” *NeuroImage* 62 (2): 816–47.
- 903 Ringach, Dario L., Michael J. Hawken, and Robert Shapley. 2002. “Receptive Field Structure of
- 904 Neurons in Monkey Primary Visual Cortex Revealed by Stimulation with Natural Image
- 905 Sequences.” *Journal of Vision* 2 (1): 12–24.
- 906 Rodd, Jennifer M., Matthew H. Davis, and Ingrid S. Johnsrude. 2005. “The Neural Mechanisms of
- 907 Speech Comprehension: fMRI Studies of Semantic Ambiguity.” *Cerebral Cortex* 15 (8):
- 908 1261–69.
- 909 Schmitt, Lea-Maria, Julia Erb, Sarah Tune, Anna U. Rysop, Gesa Hartwigsen, and Jonas Obleser.
- 910 2021. “Predicting Speech from a Cortical Hierarchy of Event-Based Time Scales.” *Science*
- 911 *Advances* 7 (49): eabi6070.
- 912 Schrimpf, Martin, Idan Asher Blank, Greta Tuckute, Carina Kauf, Eghbal A. Hosseini, Nancy
- 913 Kanwisher, Joshua B. Tenenbaum, and Evelina Fedorenko. 2021. “The Neural Architecture of
- 914 Language: Integrative Modeling Converges on Predictive Processing.” *Proceedings of the*
- 915 *National Academy of Sciences of the United States of America* 118 (45).
- 916 <https://doi.org/10.1073/pnas.2105646118>.
- 917 Scott, Terri L., Jeanne Gallée, and Evelina Fedorenko. 2017. “A New Fun and Robust Version of an
- 918 fMRI Localizer for the Frontotemporal Language System.” *Cognitive Neuroscience* 8 (3): 167–
- 919 76.
- 920 Simoncelli, E. P., and B. A. Olshausen. 2001. “Natural Image Statistics and Neural Representation.”
- 921 *Annual Review of Neuroscience* 24: 1193–1216.
- 922 Soch, Joram, John-Dylan Haynes, and Carsten Allefeld. 2016. “How to Avoid Mismodelling in GLM-
- 923 Based fMRI Data Analysis: Cross-Validated Bayesian Model Selection.” *NeuroImage* 141
- 924 (November): 469–89.
- 925 Sprague, Thomas C., Sameer Saproo, and John T. Serences. 2015. “Visual Attention Mitigates
- 926 Information Loss in Small- and Large-Scale Neural Codes.” *Trends in Cognitive Sciences* 19
- 927 (4): 215–26.
- 928 Steinmetz, H., and R. J. Seitz. 1991. “Functional Anatomy of Language Processing: Neuroimaging
- 929 and the Problem of Individual Variability.” *Neuropsychologia* 29 (12): 1149–61.
- 930 St-Yves, Ghislain, and Thomas Naselaris. 2018. “The Feature-Weighted Receptive Field: An
- 931 Interpretable Encoding Model for Complex Feature Spaces.” *NeuroImage* 180 (Pt A): 188–202.
- 932 Toneva, Mariya, Otilia Stretcu, Barnabás Póczos, Leila Wehbe, and Tom M. Mitchell. 2020. “Modeling
- 933 Task Effects on Meaning Representation in the Brain via Zero-Shot MEG Prediction.” In

- 934            *Advances in Neural Information Processing Systems*.  
935 Toneva, Mariya, and Leila Wehbe. 2019. "Interpreting and Improving Natural-Language Processing  
936 (in Machines) with Natural Language-Processing (in the Brain)." In *Advances in Neural*  
937 *Information Processing Systems*, 14928–38.  
938 Touryan, Jon, Gidon Felsen, and Yang Dan. 2005. "Spatial Structure of Complex Cell Receptive  
939 Fields Measured with Natural Images." *Neuron* 45 (5): 781–91.  
940 Vandenberghe, R., C. Price, R. Wise, O. Josephs, and R. S. J. Frackowiak. 1996. "Functional  
941 Anatomy of a Common Semantic System for Words and Pictures." *Nature* 383 (6597): 254–56.  
942 Virtanen, Pauli, Ralf Gommers, Travis E. Oliphant, Matt Haberland, Tyler Reddy, David Cournapeau,  
943 Evgeni Burovski, et al. 2020. "SciPy 1.0: Fundamental Algorithms for Scientific Computing in  
944 Python." *Nature Methods* 17 (3): 261–72.  
945 Wehbe, Leila, Brian Murphy, Partha Talukdar, Alona Fyshe, Aaditya Ramdas, and Tom Mitchell.  
946 2014. "Simultaneously Uncovering the Patterns of Brain Regions Involved in Different Story  
947 Reading Subprocesses." Edited by Kevin Paterson. *PloS One* 9 (11): e112575.  
948 Wilson, Stephen M., Alexa Bautista, Melodie Yen, Stefanie Lauderdale, and Dana K. Eriksson. 2017.  
949 "Validity and Reliability of Four Language Mapping Paradigms." *NeuroImage. Clinical* 16: 399–  
950 408.  
951 Wu, Michael C-K, Stephen V. David, and Jack L. Gallant. 2006. "Complete Functional  
952 Characterization of Sensory Neurons by System Identification." *Annual Review of*  
953 *Neuroscience* 29: 477–505.  
954 Xu, Jiang, Stefan Kemeny, Grace Park, Carol Frattali, and Allen Braun. 2005. "Language in Context:  
955 Emergent Features of Word, Sentence, and Narrative Comprehension." *NeuroImage* 25 (3):  
956 1002–15.  
957 Yuan, Jiahong, and Mark Liberman. 2008. "Speaker Identification on the SCOTUS Corpus."  
958 *Proceedings of Acoustics*, May.  
959

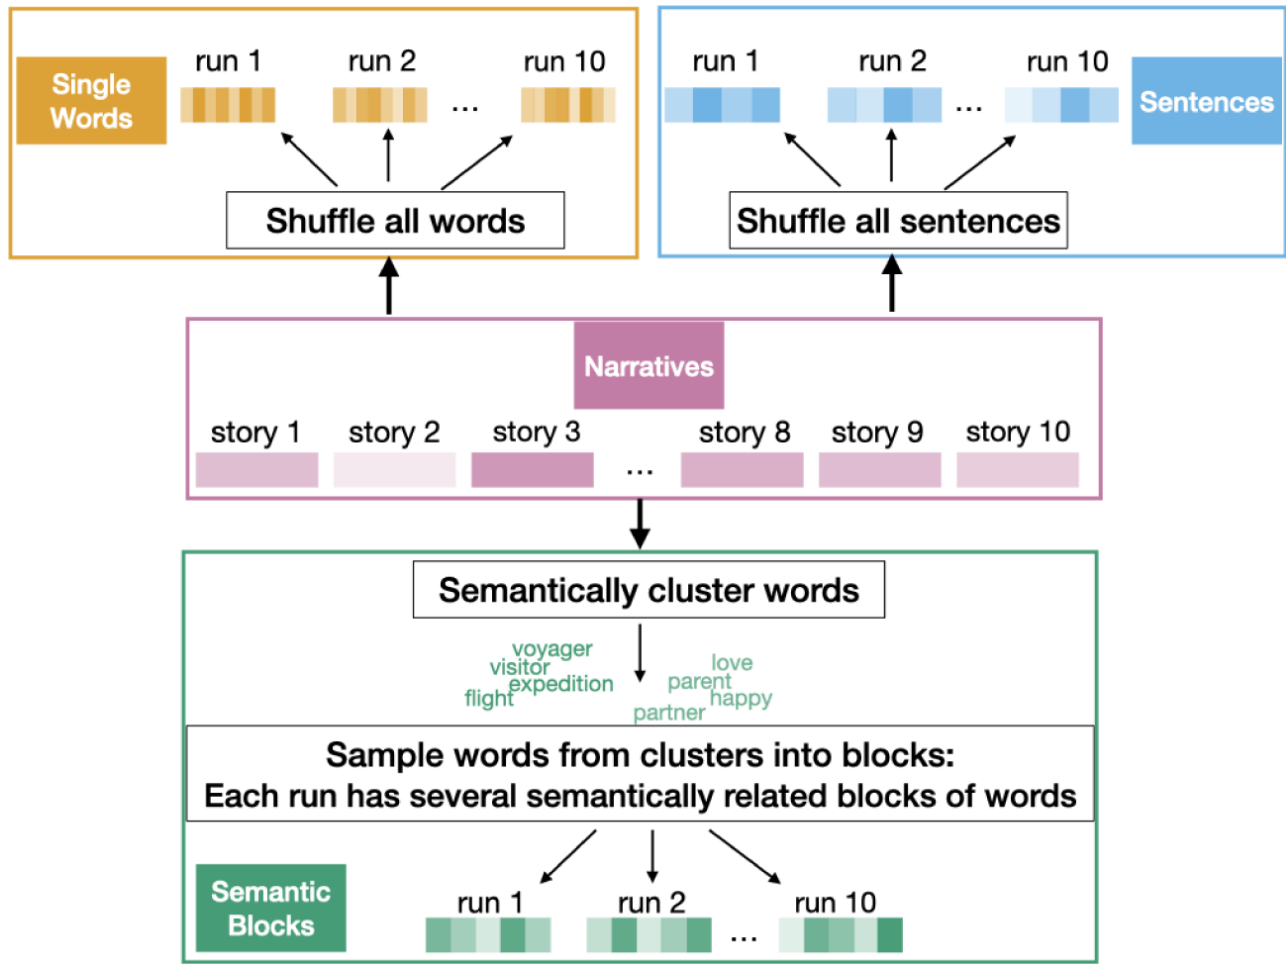

961 **Figure 1: Stimulus conditions.** The experiment contained four stimulus conditions that were based  
962 on the ten narratives used in Huth et al. (2016). The Single Words condition consisted of words  
963 sampled randomly from the ten narratives. The Semantic Blocks condition consisted of blocks of  
964 words sampled from clusters of semantically similar words from the ten narratives. There were 12  
965 distinct clusters of semantically similar words, and blocks of words were created by randomly  
966 sampling 114 words from one word cluster for each block. The Sentences condition consisted of  
967 sentences sampled randomly from the ten narratives. Finally, the Narratives condition consisted of  
968 the ten original narratives.



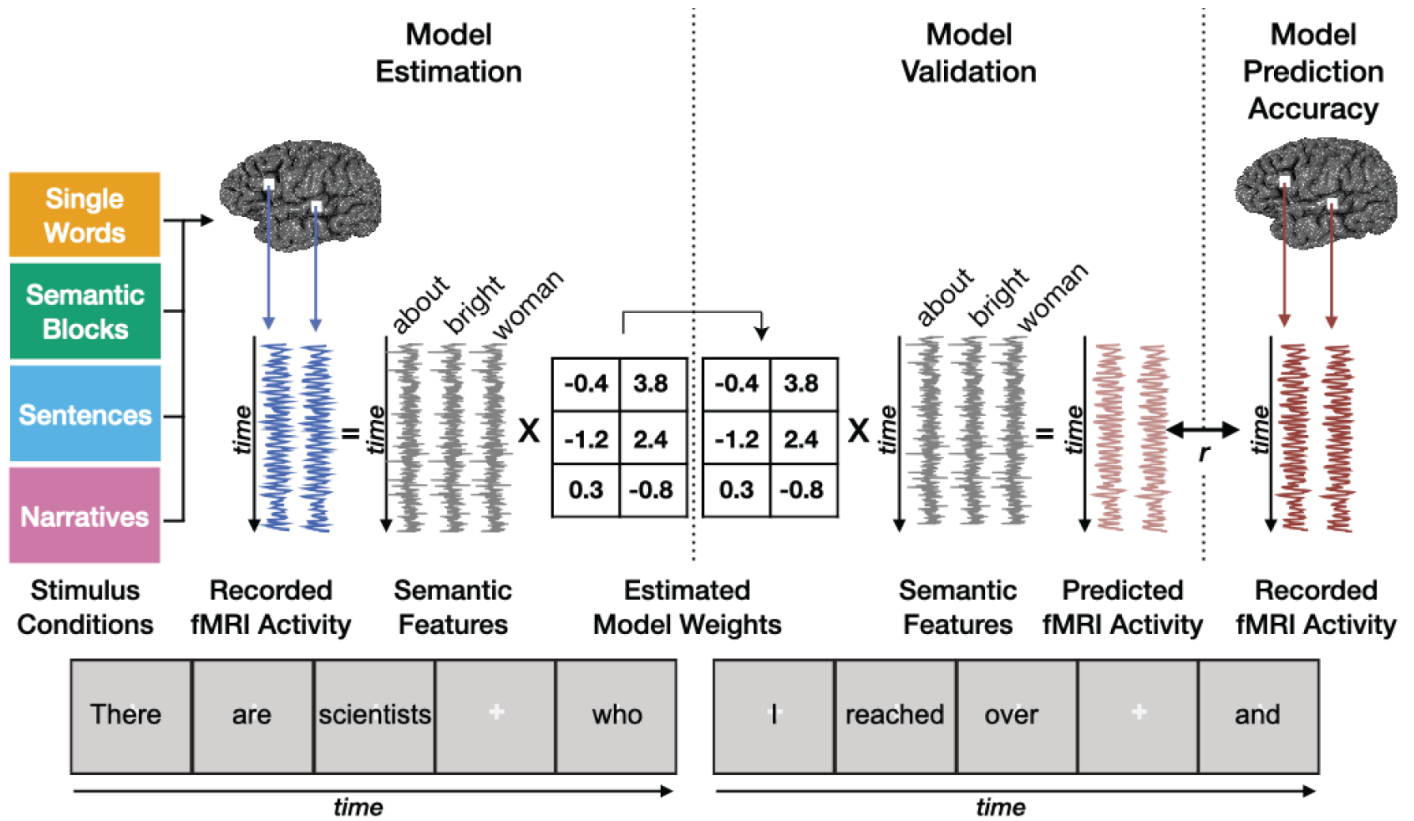

970 **Figure 2: Voxelwise Modeling.** Four subjects read words from the four stimulus conditions while  
 971 BOLD responses were recorded. Each stimulus word was projected into a 985-dimensional word  
 972 embedding space that was independently constructed using word co-occurrence statistics from a  
 973 large corpus (Semantic Features). A finite impulse response (FIR) regularized regression model was  
 974 estimated separately for each voxel in every subject and condition using banded ridge regression  
 975 (Nunez-Elizalde et al. 2019). The estimated model weights were then used to predict BOLD  
 976 responses to a separate, held-out validation stimulus. Model prediction accuracy was quantified as  
 977 the correlation ( $r$ ) between the predicted and recorded BOLD responses to the validation stimulus.

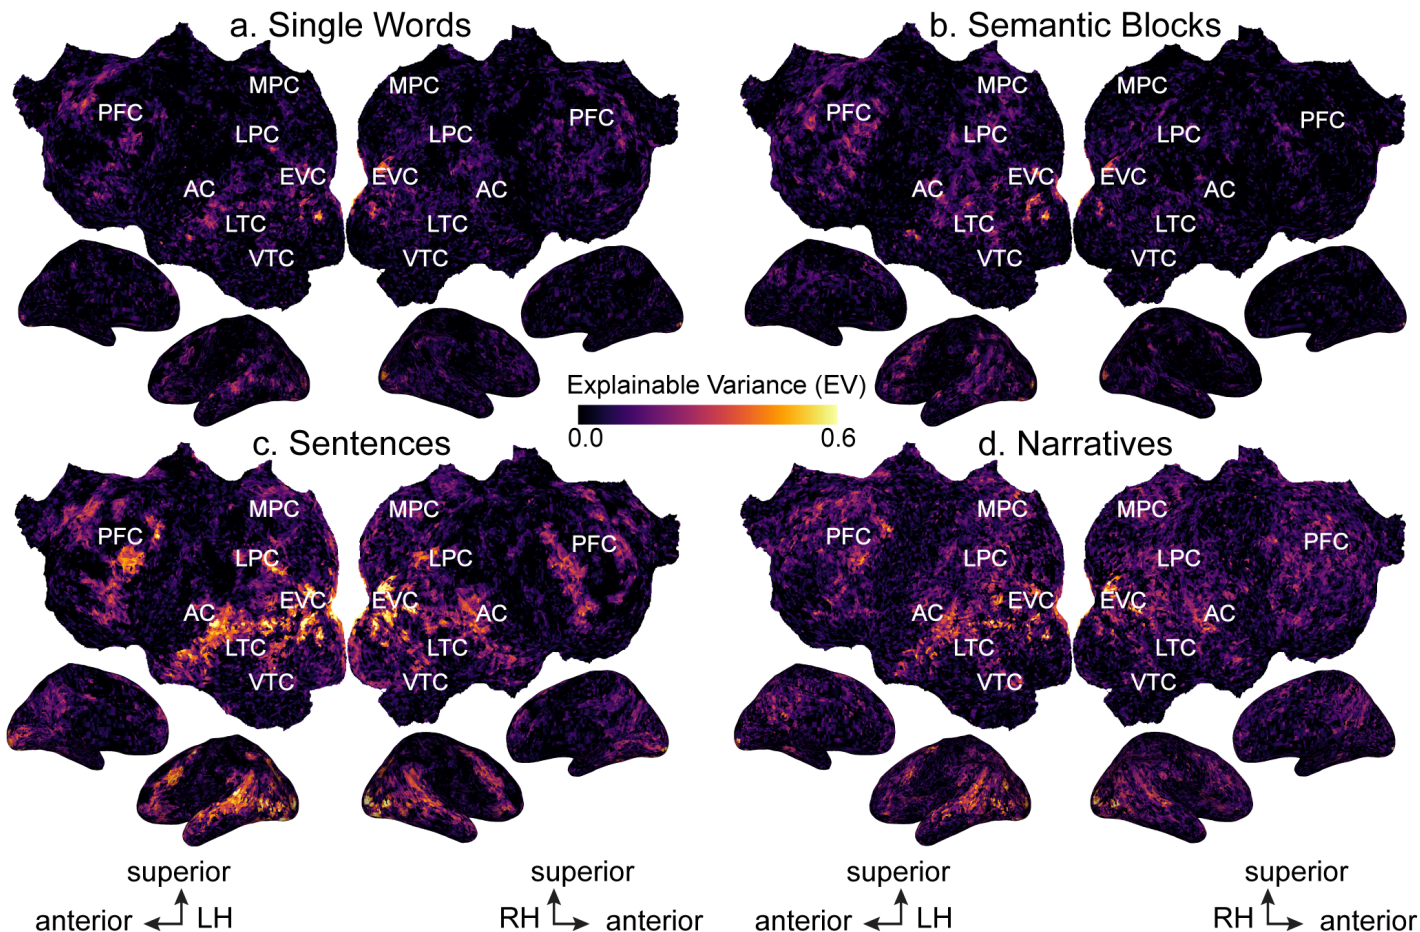

979 **Figure 3. Explainable variance (EV) for the four conditions across the cortical surface.** EV for  
 980 the four conditions is shown for one subject (S1) on the subject's flattened cortical surface. EV was  
 981 computed as an estimate of the evoked signal-to-noise ratio (SNR). Here EV is given by the color  
 982 scale shown in the middle, and voxels that have high EV (i.e., high evoked SNR) appear yellow. (LH:  
 983 Left Hemisphere, RH: Right Hemisphere, AC: auditory cortex, EVC: early visual cortex, LTC: lateral  
 984 temporal cortex, VTC: ventral temporal cortex, LPC: lateral parietal cortex, MPC: medial parietal  
 985 cortex, PFC: prefrontal cortex) The format is the same in all panels. **a.** EV was computed for the  
 986 Single Words condition and is shown on the flattened cortical surface of subject S1. Scattered voxels  
 987 in bilateral primary visual cortex, superior temporal sulcus (STS), and inferior frontal gyrus (IFG) have  
 988 high EV. **b.** EV was computed for the Semantic Blocks condition. Similar to the Single Words  
 989 condition, scattered voxels in bilateral primary visual cortex, STS, and IFG have high EV. **c.** EV was  
 990 computed for the Sentences condition. Many voxels in bilateral visual, parietal, temporal, and  
 991 prefrontal cortices have high EV. **d.** EV was computed for the Narratives condition. Similar to the  
 992 Sentences condition, voxels in bilateral visual, parietal, temporal, and prefrontal cortices have high  
 993 EV. Together, these results show that increasing context increases evoked SNR in bilateral visual,  
 994 temporal, parietal, and prefrontal cortices. (See Extended Data Figure 3-1 for significant EV voxels for  
 995 subject S1 and Extended Data Figure 3-2 for EV for all subjects.)

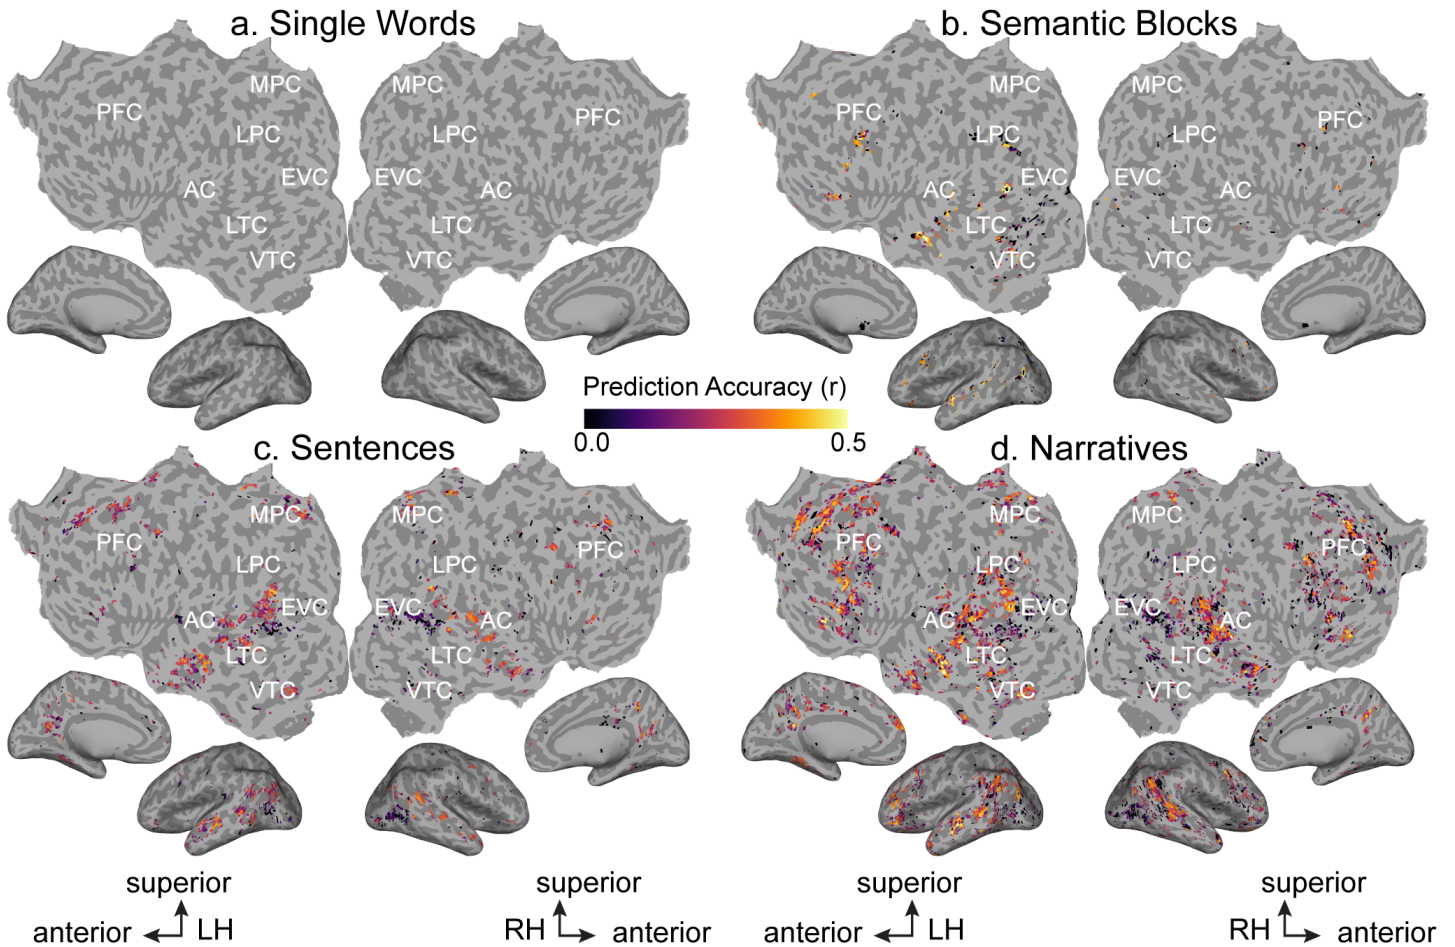

**Figure 4. Semantic model prediction accuracy for the four conditions across the cortical surface.** Semantic model prediction accuracy in the four conditions is shown on the flattened cortical surface of one subject (S1; see Extended Data Figure 4-1 and 4-2 for all subjects). Voxelwise modeling was first used to estimate semantic model weights in the four conditions. Semantic model prediction accuracy was then computed as the correlation ( $r$ ) between the subject's recorded BOLD activity to the held-out validation stimulus and the BOLD activity predicted by the semantic model. In each panel, only voxels with significant semantic model prediction accuracy ( $p < 0.05$ , FDR corrected) are shown. Prediction accuracy is given by the color scale in the middle, and voxels that have a high prediction accuracy appear yellow. Voxels for which the semantic model prediction accuracy is not statistically significant are shown in gray. (LH: Left Hemisphere, RH: Right Hemisphere, AC: auditory cortex, EVC: early visual cortex, LTC: lateral temporal cortex, VTC: ventral temporal cortex, LPC: lateral parietal cortex, MPC: medial parietal cortex, PFC: prefrontal cortex) **a.** Semantic model prediction accuracy was computed for the Single Words condition. No voxels are significantly predicted in the Single Words condition (see Extended Data Figure 4-3 for the number of semantically selective voxels for the four conditions for all subjects). **b.** Semantic model prediction accuracy was computed for the Semantic Blocks condition. The format is the same as panel **a.** Voxels in left STS and IFG are significantly predicted. **c.** Semantic model prediction accuracy was computed for the Sentences condition. The format is the same as panel **a.** Voxels in left angular gyrus, left STG, bilateral STS, bilateral ventral precuneus, bilateral ventral premotor speech area (sPMv), bilateral superior frontal sulcus (SFS), and left superior frontal gyrus (SFG) are significantly predicted. **d.** Semantic model prediction accuracy was computed for the Narratives condition. The format is the same as panel **a.** Voxels in bilateral angular gyrus, bilateral STS, bilateral STG, bilateral temporal

1019 parietal junction (TPJ), bilateral sPMv, bilateral ventral precuneus, bilateral SFS, bilateral SFG,  
1020 bilateral IFG, left inferior parietal lobule (IPL), and left posterior cingulate gyrus are significantly  
1021 predicted. Together, these results suggest that increasing context increases the representation of  
1022 semantic information in bilateral temporal, parietal, and prefrontal cortices.



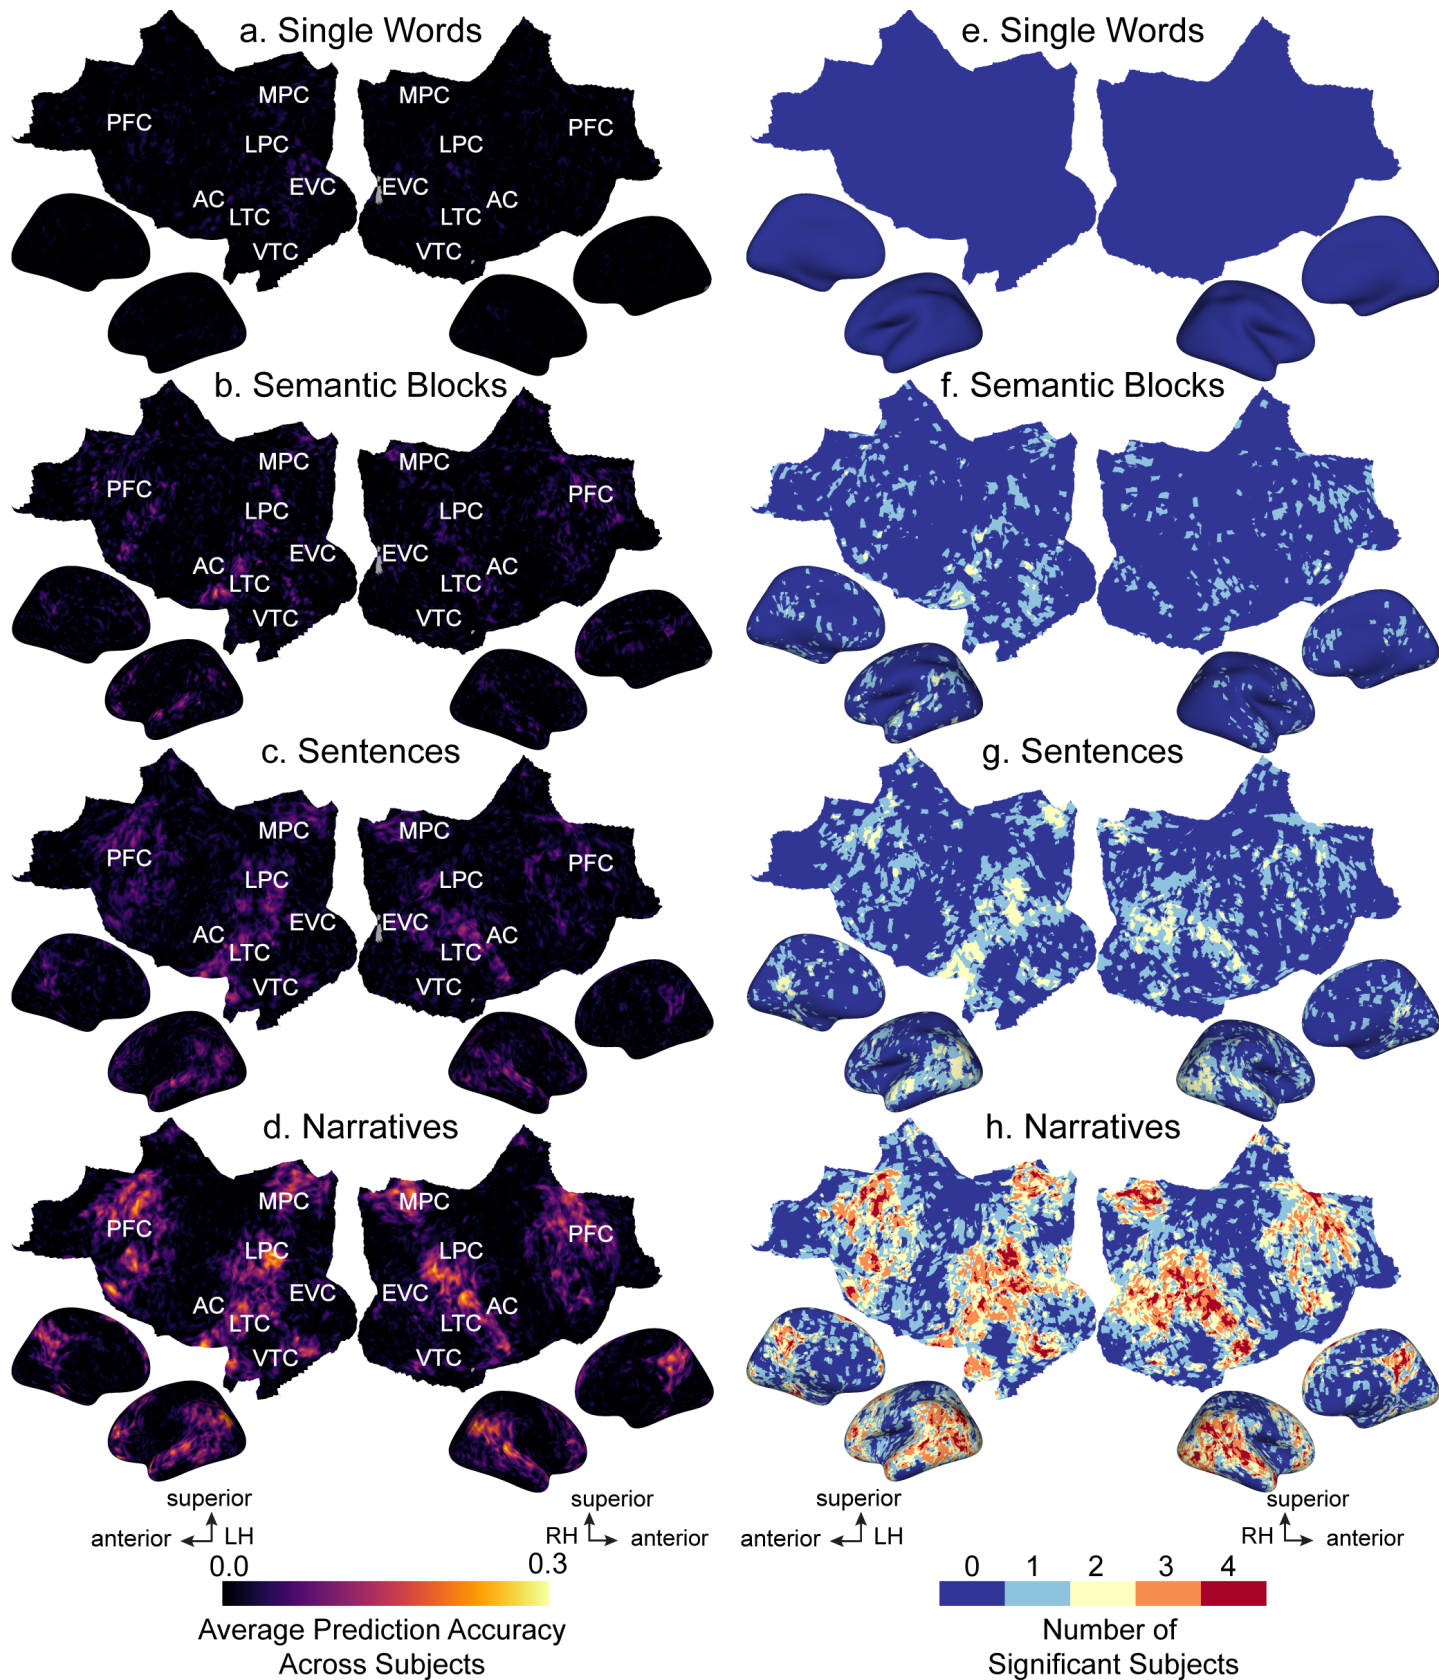

1024 **Figure 5. Semantic model prediction accuracy across all subjects for the four conditions in**  
 1025 **standard brain space.** Semantic model prediction accuracy was first computed for each subject and  
 1026 for each condition as described in **Figure 4**. These individualized predictions were then projected into  
 1027 the standard MNI brain space. **a.-d.** Average prediction accuracy across the four subjects is

1028 computed for each MNI voxel and shown for each condition on the cortical surface of the MNI brain.  
1029 Average prediction accuracy is given by the color scale, and voxels with higher prediction accuracy  
1030 appear brighter. (LH: Left Hemisphere, RH: Right Hemisphere, AC: auditory cortex, EVC: early visual  
1031 cortex, LTC: lateral temporal cortex, VTC: ventral temporal cortex, LPC: lateral parietal cortex, MPC:  
1032 medial parietal cortex, PFC: prefrontal cortex) **a.** In the Single Words condition, average prediction  
1033 accuracy is low across the cortical surface. **b.** In the Semantic Blocks condition, average prediction  
1034 accuracy is high in voxels in left anterior STS. **c.** In the Sentences condition, average prediction  
1035 accuracy is high in bilateral STS, STG, anterior temporal lobe, angular gyrus, ventral precuneus,  
1036 SFS, and SFG. **d.** In the Narratives condition, average prediction accuracy is very high in bilateral  
1037 STS, STG, MTG, anterior temporal lobe, angular gyrus, IPL, ventral precuneus, posterior cingulate  
1038 gyrus, Broca's area, IFG, SFS, SFG, and left posterior inferior temporal sulcus. **e.-h.** For each  
1039 condition, statistical significance of prediction accuracies was determined in each subject's native  
1040 brain space and then projected into the MNI brain space. The number of subjects with significant  
1041 prediction accuracy is shown for each voxel on the cortical surface of the MNI brain. The number of  
1042 significant subjects is given by the color scale shown at bottom. Dark red voxels are significantly  
1043 predicted in all subjects, and dark blue voxels are not significantly predicted in any subjects. **e.** In the  
1044 Single Words condition, no voxels are semantically selective for any subjects. **f.** In the Semantic  
1045 Blocks condition, scattered voxels in left STS are semantically selective in two out of four subjects. **g.**  
1046 In the Sentences condition, voxels in the bilateral STS, STG, angular gyrus, ventral precuneus, and  
1047 SFS are semantically selective in two out of four subjects. **h.** In the Narratives condition, voxels in  
1048 bilateral angular gyrus, bilateral STS, anterior temporal lobe, SFS, SFG, IFG, ventral precuneus,  
1049 posterior cingulate gyrus, and right STG are semantically selective in all four subjects. The results  
1050 shown here are consistent with those in **Figure 4**, and they suggest that increasing context increases  
1051 the representation of semantic information across the cortical surface at the group level but not for  
1052 individual subjects.

### a. Semantic tuning for subject S1

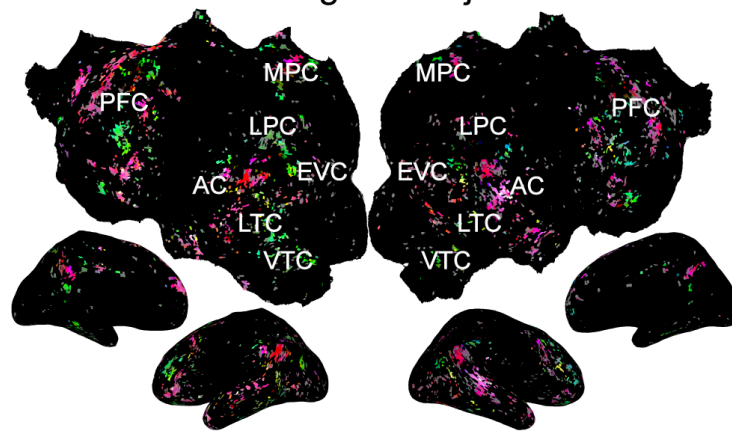

### b. Semantic tuning for subject S2

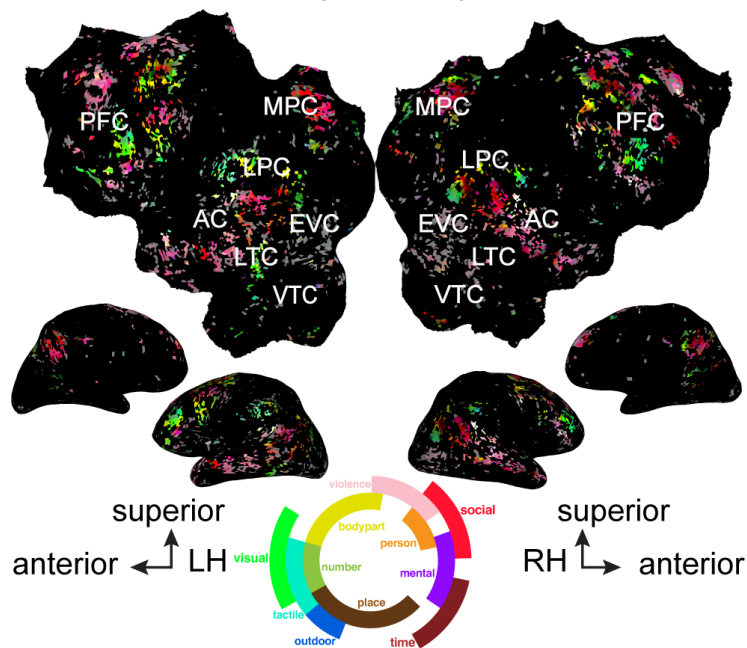

1054 **Figure 6. Semantic tuning of voxels that are semantically selective in the Narratives condition**  
1055 **but not the Sentences condition.** Semantic tuning is shown on the flattened cortical surface of two  
1056 subjects (S1 and S2) for voxels that are semantically selective in the Narratives condition but not in  
1057 the Sentences condition. These voxels are in the bilateral superior temporal sulcus, middle temporal  
1058 gyrus, precuneus, inferior frontal gyrus, and ventrolateral and dorsolateral prefrontal cortex. Semantic  
1059 model weights estimated in the Narratives condition were projected into a low-dimensional subspace  
1060 created by performing principal components analysis (PCA) on semantic model weights estimated in  
1061 Huth et al. 2016. Each voxel is colored according to the projection of its Narratives semantic model  
1062 weights onto the first (red), second (green), and third (blue) PCs. The color wheel legend shows the  
1063 semantic concepts associated with different colors. Most voxels in both subjects have a high red  
1064 value or a high green value. A high red value corresponds to tuning for concepts related to humans  
1065 and social relationships, and a high green value corresponds to tuning for concepts related to  
1066 materials and measurements. (LH: Left Hemisphere, RH: Right Hemisphere, AC: auditory cortex,  
1067 EVC: early visual cortex, LTC: lateral temporal cortex, VTC: ventral temporal cortex, LPC: lateral  
1068 parietal cortex, MPC: medial parietal cortex, PFC: prefrontal cortex)



### a. Weight correlation for subject S1

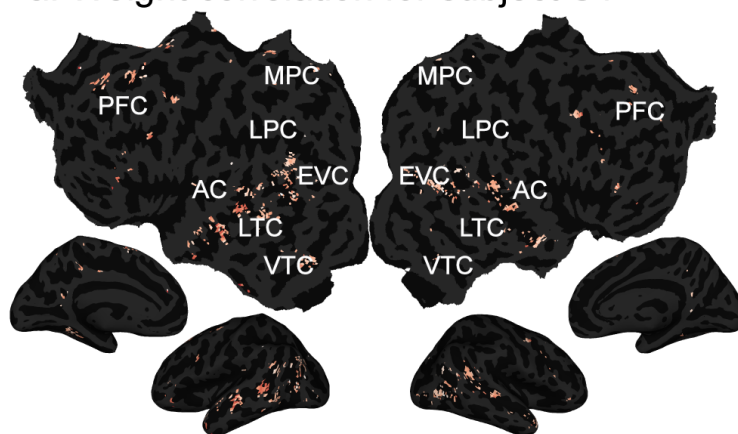

### b. Weight correlation for subject S2

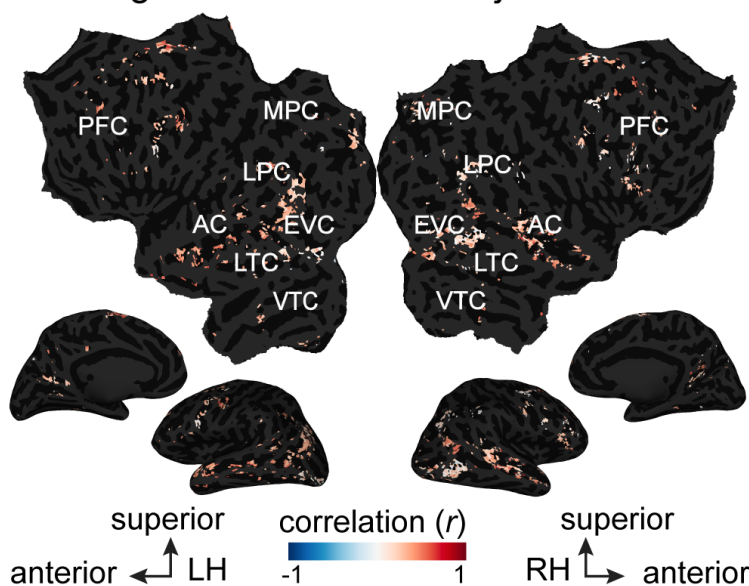

1070 **Figure 7. Correlation of semantic model weights estimated in the Sentences and Narratives**  
1071 **conditions.** Pearson's correlation coefficient between semantic model weights estimated in the  
1072 Sentences condition and semantic model weights estimated in the Narratives conditions is plotted on  
1073 the flattened cortical surface of two subjects (S1 and S2). Only voxels that are semantically selective  
1074 in both conditions are shown. These include voxels in the superior temporal sulcus and prefrontal  
1075 cortex in both hemispheres and in both subjects. These voxels are on average moderately correlated  
1076 between these two conditions (S1 correlation min=-0.319, max=0.817, mean=0.344; S2 correlation  
1077 min=-0.271, max=0.725, mean=0.316), indicating that the semantic model weights estimated in the  
1078 Sentences and Narratives conditions point in different directions in the semantic space. This shows  
1079 that semantic tuning changes between the Sentences and Narratives conditions. (LH: Left  
1080 Hemisphere, RH: Right Hemisphere, AC: auditory cortex, EVC: early visual cortex, LTC: lateral  
1081 temporal cortex, VTC: ventral temporal cortex, LPC: lateral parietal cortex, MPC: medial parietal  
1082 cortex, PFC: prefrontal cortex)

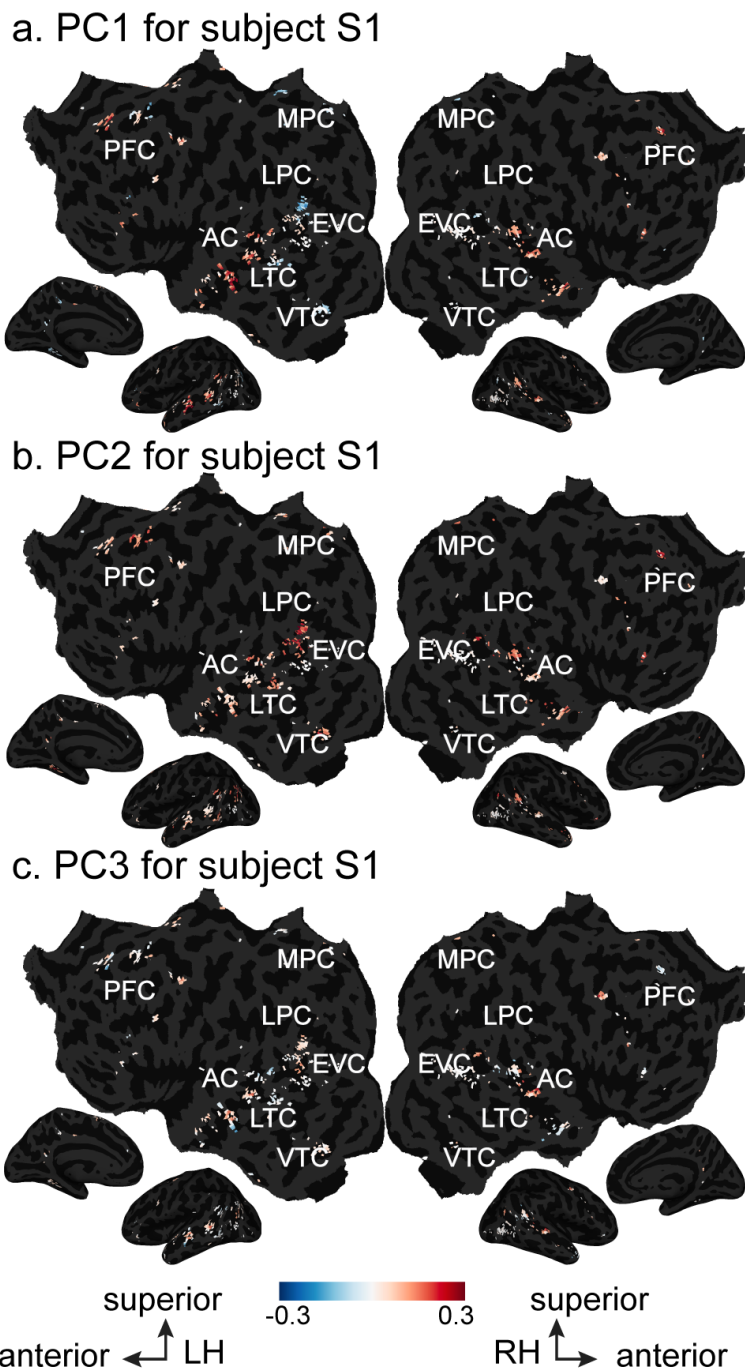

1084 **Figure 8. Semantic tuning shifts between the Sentences and Narratives conditions.** Semantic  
1085 model weights estimated in the Sentences condition were subtracted from semantic model weights  
1086 estimated in the Narratives condition. PCA was then applied to the resulting difference vectors for  
1087 each subject separately. The projection of the difference vectors onto the first three PCs is shown on  
1088 the flattened cortical surface of one subject (S1; see Extended Data Figure 8-2 for subject S2; see  
1089 Extended Data Figure 8-1 for the amount of variance explained by each of the first five PCs for each  
1090 subject). Only voxels that are semantically selective in both conditions are shown. Projection strength  
1091 is given by the color scales, and the ends of the color scales are labeled with the corresponding  
1092 semantic concepts for each PC. Voxels that project onto one end of a PC appear red, while voxels  
1093 that project onto the opposite end of the same PC appear blue. (LH: Left Hemisphere, RH: Right  
1094 Hemisphere, AC: auditory cortex, EVC: early visual cortex, LTC: lateral temporal cortex, VTC: ventral  
1095 temporal cortex, LPC: lateral parietal cortex, MPC: medial parietal cortex, PFC: prefrontal cortex) **a.**

1096 The first PC for subject S1 is shown. Voxels in bilateral STS and bilateral SFG are red while voxels in  
1097 bilateral angular gyrus are blue in both subjects. **b.** The second PC for subject S1 is shown. Voxels in  
1098 bilateral angular gyrus and superior STS are red while no voxels are blue in both subjects. **c.** The  
1099 third PC for subject S1 is shown. Voxels in right STS are red while no voxels are blue in both  
1100 subjects. The ten most and least correlated words for each PC are shown in Extended Data Figure 8-  
1101 3. These results show that semantic tuning shifts between the Sentences and Narratives conditions  
1102 are spatially organized across cortex.

a. Single Words predicting Narratives vs. Narratives predicting Narratives

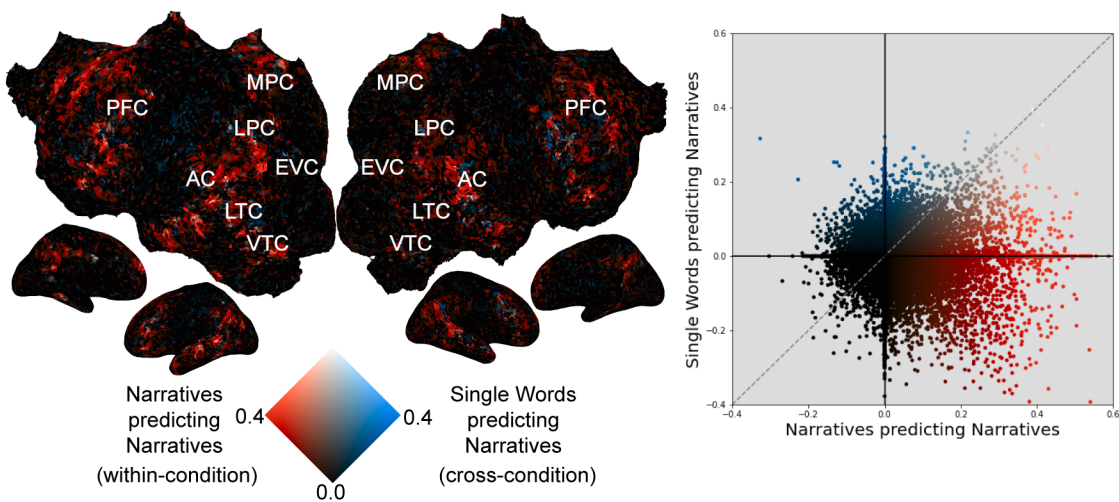

b. Semantic Blocks predicting Narratives vs. Narratives predicting Narratives

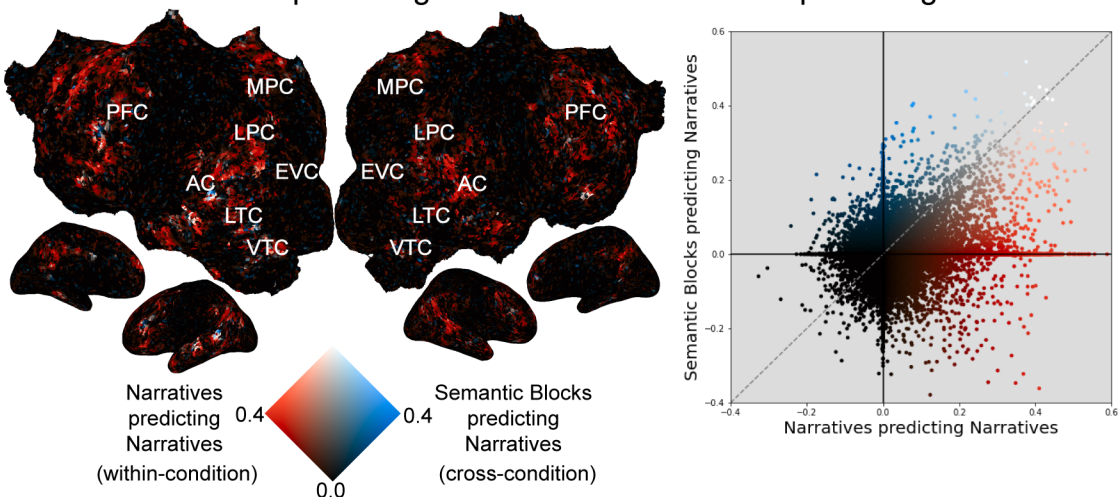

c. Sentences predicting Narratives vs. Narratives predicting Narratives

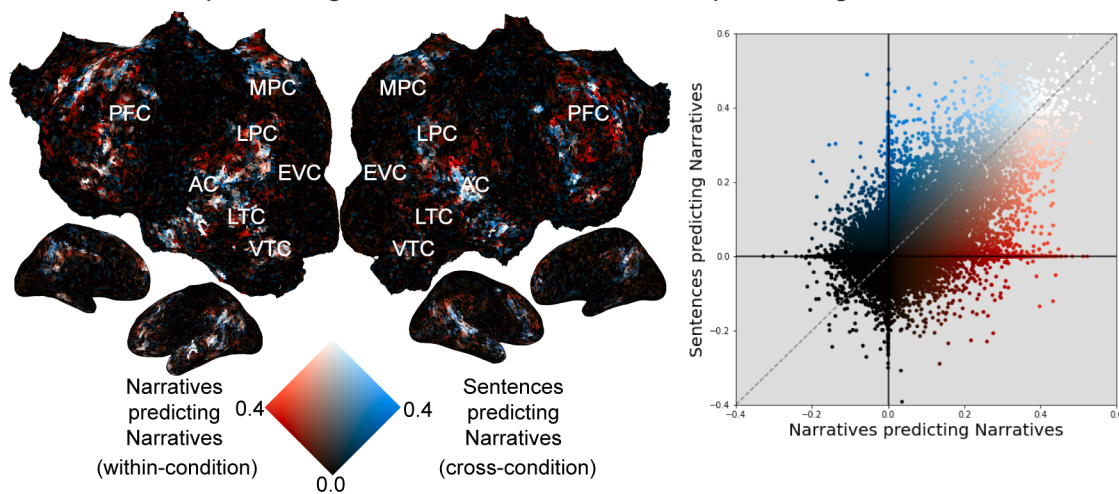

1104 **Figure 9. Generalization of semantic model weights estimated in the Single Words, Semantic**  
1105 **Blocks, and Sentences conditions to the Narratives condition for subject S1. a.** Semantic model  
1106 weights estimated in the Single Words condition were used to predict BOLD responses to the held-  
1107 out validation stimulus in the Narratives condition. (left) The resulting cross-condition semantic model  
1108 prediction accuracies are shown with the within-condition Narratives semantic model prediction  
1109 accuracies on the flattened cortical surface of subject S1 with a 2D colormap (see Extended Data

1110 Figure 9-2 for subject S2). (LH: Left Hemisphere, RH: Right Hemisphere, AC: auditory cortex, EVC:  
1111 early visual cortex, LTC: lateral temporal cortex, VTC: ventral temporal cortex, LPC: lateral parietal  
1112 cortex, MPC: medial parietal cortex, PFC: prefrontal cortex) The axes of the colormap correspond to  
1113 the cross-condition (blue) and within-condition (red) prediction accuracies. Voxels where the within-  
1114 condition prediction accuracy is high and the cross-condition prediction accuracy is low appear red.  
1115 Voxels where the within-condition prediction accuracy is low and the cross-condition prediction  
1116 accuracy is high appear blue. Voxels where both the within-condition prediction accuracy and the  
1117 cross-condition prediction accuracy are high appear white. Finally, voxels where both the within-  
1118 condition prediction accuracy and the cross-condition prediction accuracy are low appear black. In  
1119 this comparison, many voxels throughout bilateral temporal, parietal, and prefrontal cortex are red. In  
1120 addition, there are a few blue and white voxels scattered across the cortical surface. (right) Cross-  
1121 condition semantic model prediction accuracy (y-axis) is plotted against within-condition Narratives  
1122 semantic model prediction accuracy (x-axis) for each cortical voxel. In most voxels, the cross-  
1123 condition prediction accuracy is worse than the Narratives prediction accuracy. **b.** Semantic model  
1124 weights estimated in the Semantic Blocks condition were used to predict BOLD responses to the  
1125 held-out validation stimulus in the Narratives condition. The format is the same as panel a. Many  
1126 voxels across bilateral temporal, parietal, and prefrontal cortex are red. Voxels located in the left  
1127 superior temporal sulcus (STS) are white, and a few voxels scattered across the cortical surface are  
1128 blue. In most voxels, the cross-condition prediction accuracy is worse than the Narratives prediction  
1129 accuracy. **c.** Semantic model weights estimated in the Sentences condition were used to predict  
1130 BOLD responses to the held-out validation stimulus in the Narratives condition. The format is the  
1131 same as panel a. Voxels located in left IPL, right SFS, bilateral STG and bilateral posterior cingulate  
1132 gyrus are red. Voxels located in bilateral angular gyrus, bilateral STS, portions of TPJ, in bilateral  
1133 sPMv, bilateral ventral precuneus, bilateral SFG, bilateral IFG, and left SFS are white. These cross-  
1134 condition prediction accuracy in these white voxels also reach statistical significance. This suggests  
1135 that semantic model weights estimated in the Sentences condition generalize to the Narratives  
1136 condition in these voxels (see Extended Data Figure 9-1 for S1 and Extended Data Figure 9-3 for  
1137 S2). Scattered voxels located in bilateral precuneus, right IFG, and portions of SFS are blue. In many  
1138 voxels, the cross-condition prediction accuracy is worse than the Narratives prediction accuracy.  
1139 Together, these results show semantic model weights estimated in conditions with less context do not  
1140 generalize well to natural stories.



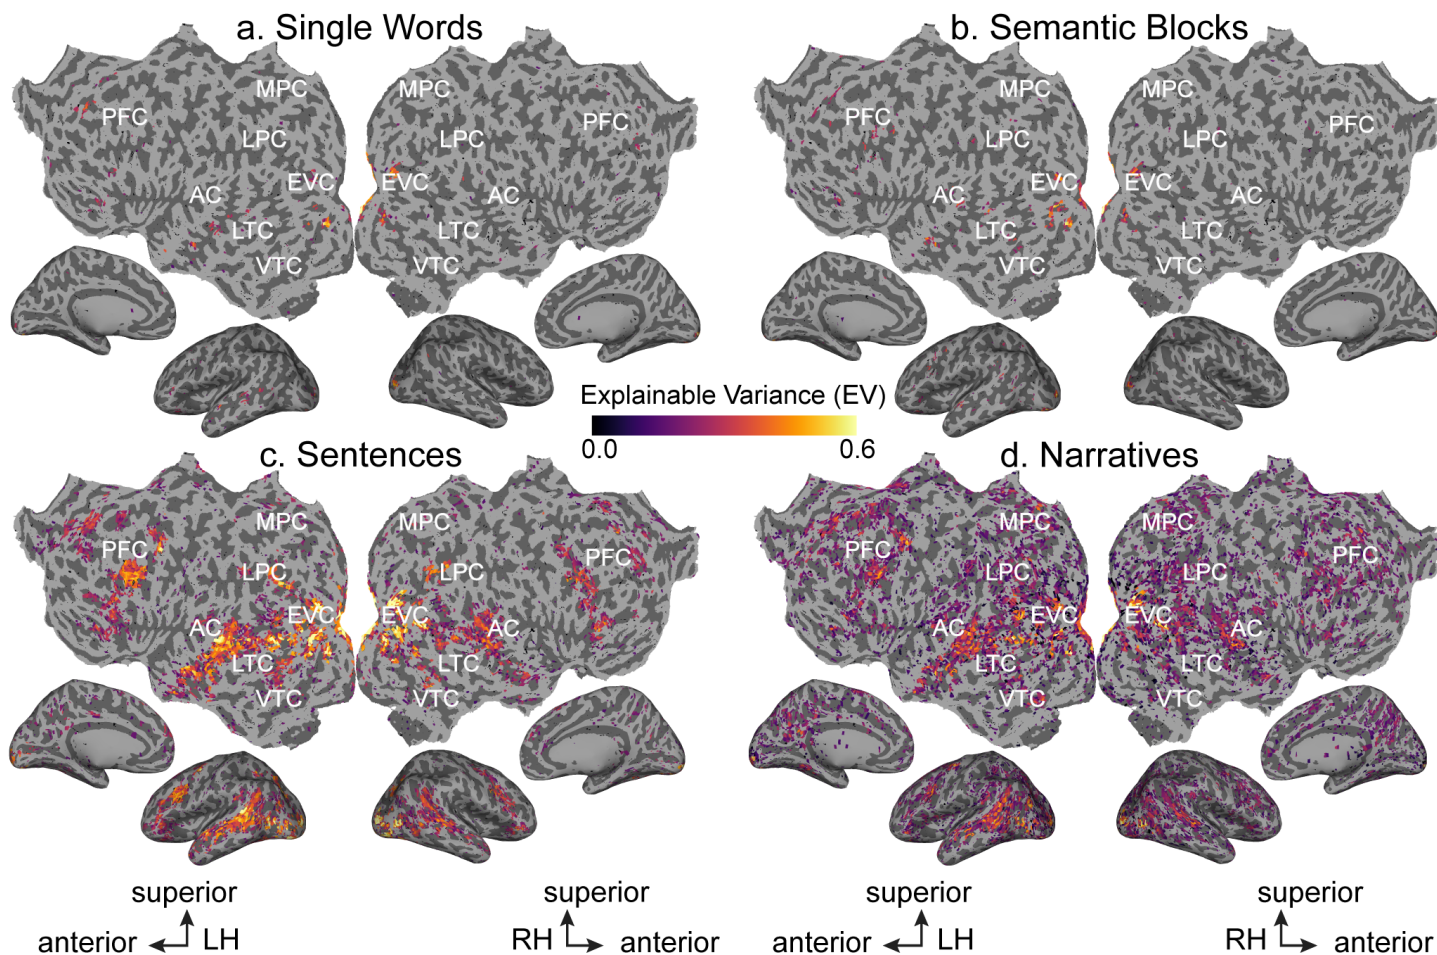

**Figure 3-1. Significant explainable variance (EV) for the four conditions across the cortical surface.** EV is shown for the four conditions on the flattened cortical surface of one subject (S1). EV was computed as an estimate of the evoked signal-to-noise ratio (SNR). Only voxels with significant EV ( $p < 0.05$ , FDR corrected) are shown. EV is given by the color scale shown in the middle, and voxels that have high EV appear yellow. Voxels with EV values that are not statistically significant are shown in gray. (LH: Left Hemisphere, RH: Right Hemisphere, AC: auditory cortex, EVC: early visual cortex, LTC: lateral temporal cortex, VTC: ventral temporal cortex, LPC: lateral parietal cortex, MPC: medial parietal cortex, PFC: prefrontal cortex) **a.** EV was computed for the Single Words condition, and significant voxels are shown on the flattened cortical surface of subject S1. Scattered voxels in bilateral primary visual cortex, left STS, and left IFG have significant EV. **b.** Same as panel **a.** but for the Semantic Blocks condition. Similar to the Single Words condition, scattered voxels in bilateral primary visual cortex, left STS, and left IFG have significant EV. **c.** Same as panel **a.** but for the Sentences condition. Many voxels in bilateral visual, parietal, temporal, and prefrontal cortices have significant EV. **d.** Same as panel **a.** but for the Narratives condition. Similar to the Sentences condition, voxels in bilateral visual, parietal, temporal, and prefrontal cortices have high EV.



1157

a. Subject S2

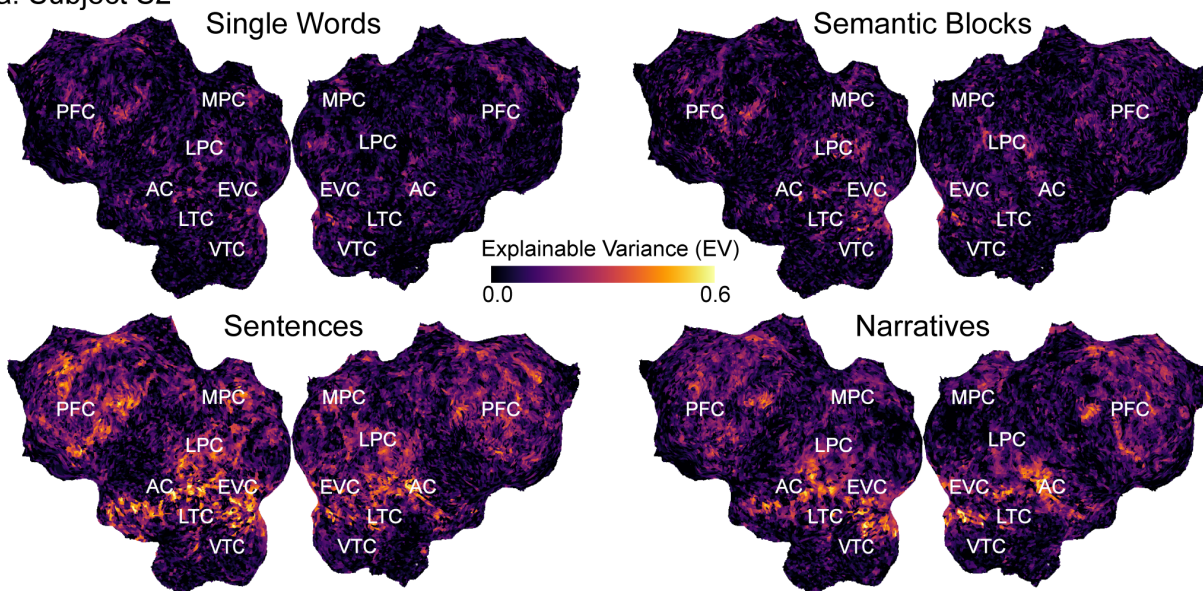

b. Subject S3

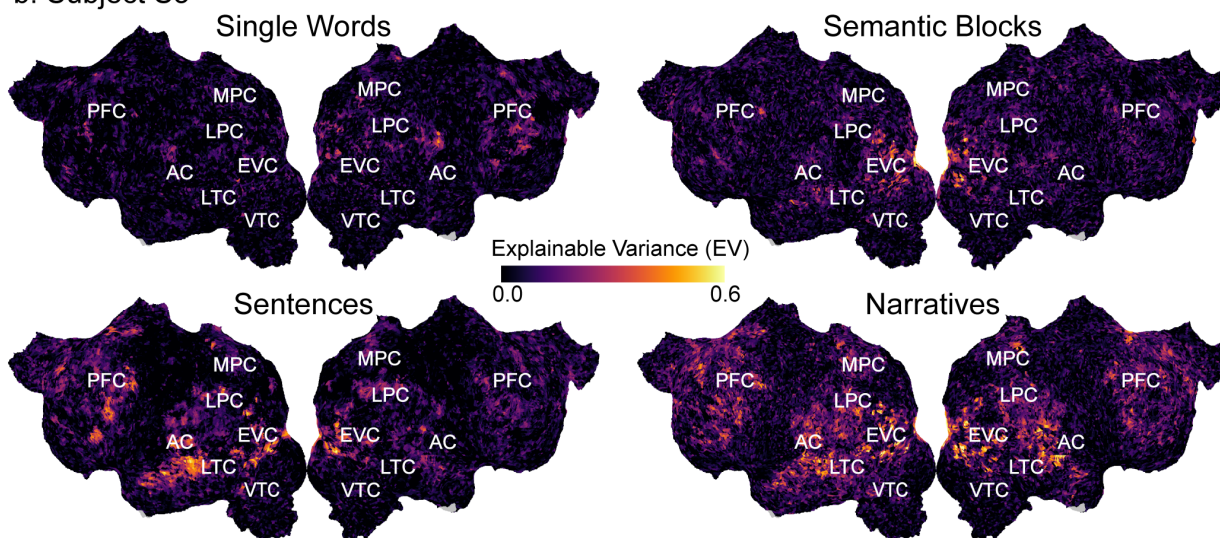

c. Subject S4

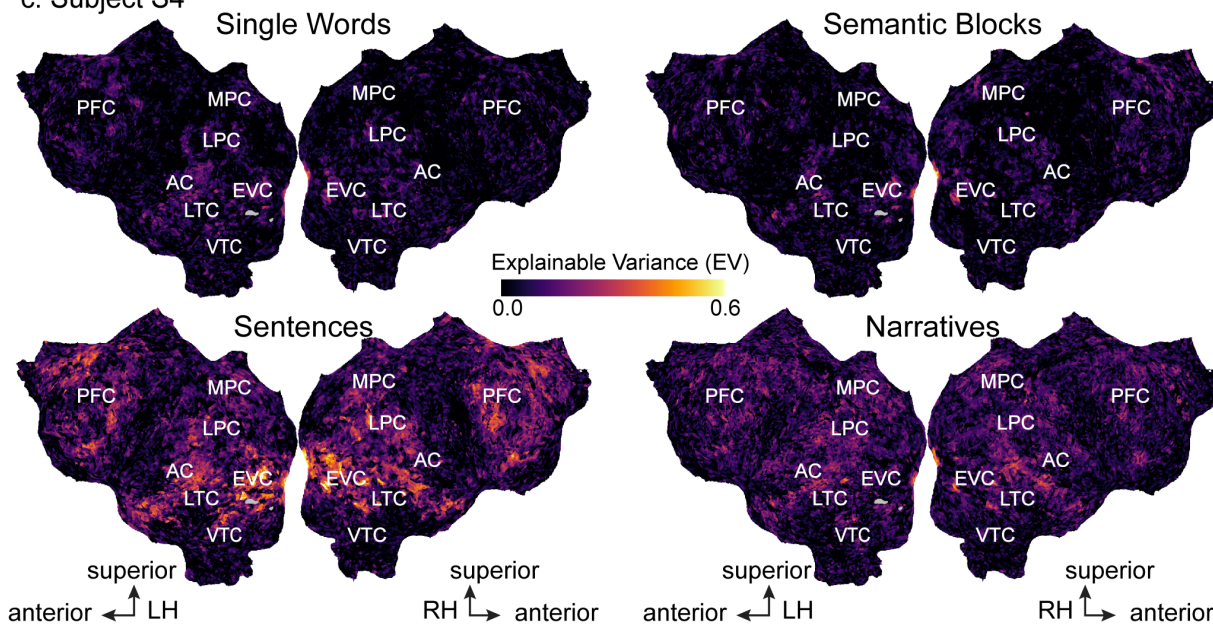



1158 **Figure 3-2. Explainable variance (EV) for the four conditions across the cortical surface for**  
1159 **subjects S2, S3, and S4.** EV is shown for the four conditions on the flattened cortical surface of  
1160 subjects S2, S3, and S4. The format is the same as **Figure 3**. EV was computed as an estimate of  
1161 the evoked signal-to-noise ratio (SNR). EV is given by the color scale shown in the middle, and  
1162 voxels that have high EV (i.e., high evoked SNR) appear yellow. (LH: Left Hemisphere, RH: Right  
1163 Hemisphere) Across all subjects, EV is low across most of the cortical surface in the Single Words  
1164 and Semantic Blocks conditions. In contrast, EV is high for many voxels in bilateral visual, parietal,  
1165 temporal, and prefrontal cortices in the Sentences and Narratives conditions.

1166

a. Subject S2

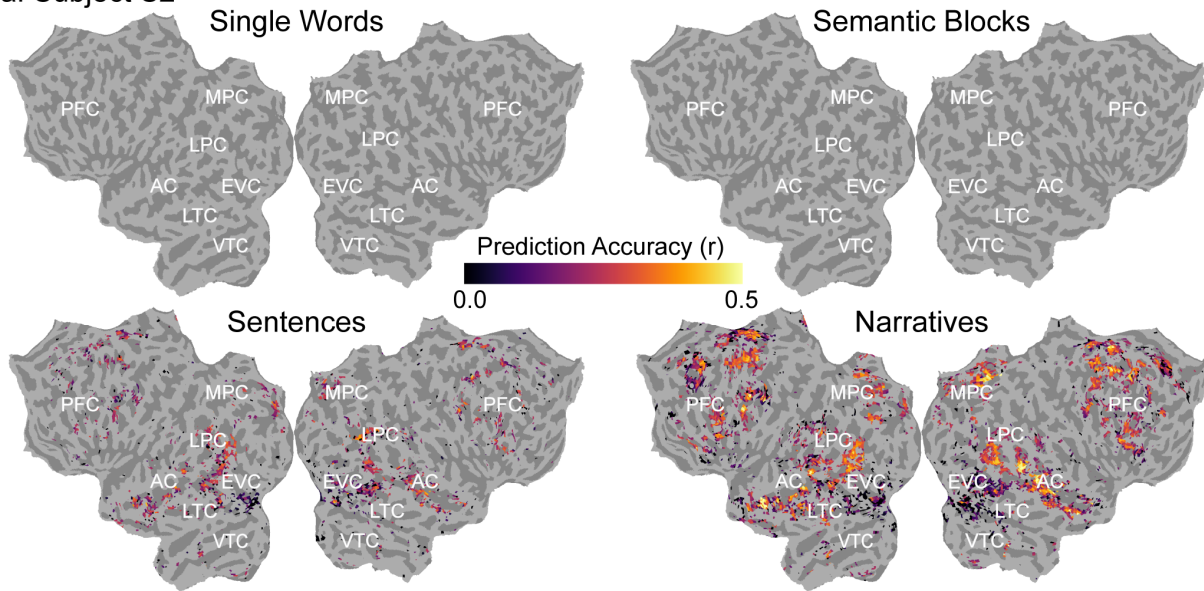

b. Subject S3

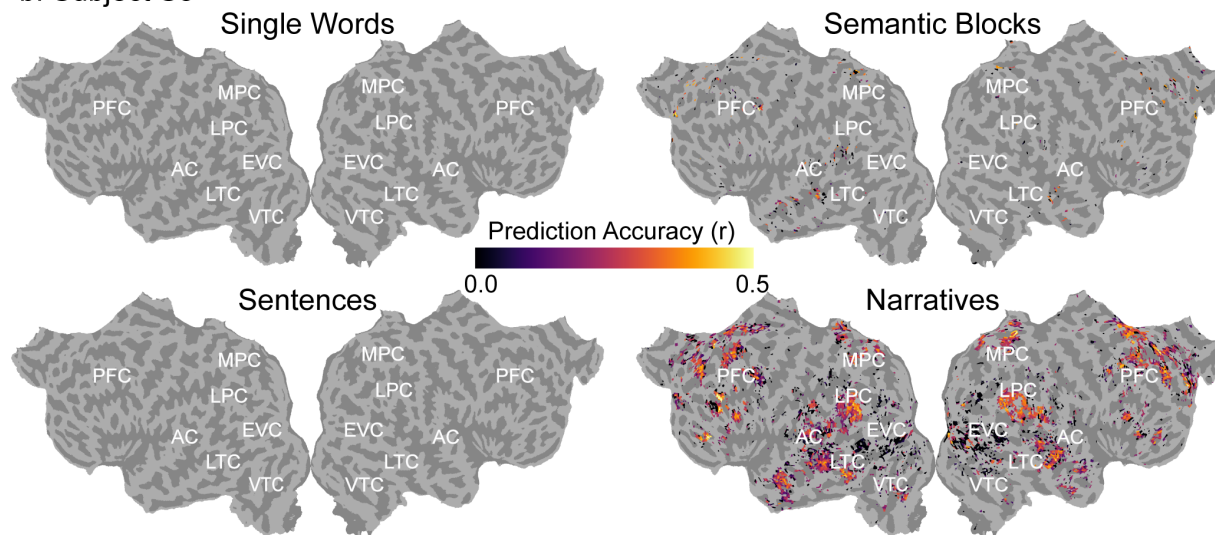

c. Subject S4

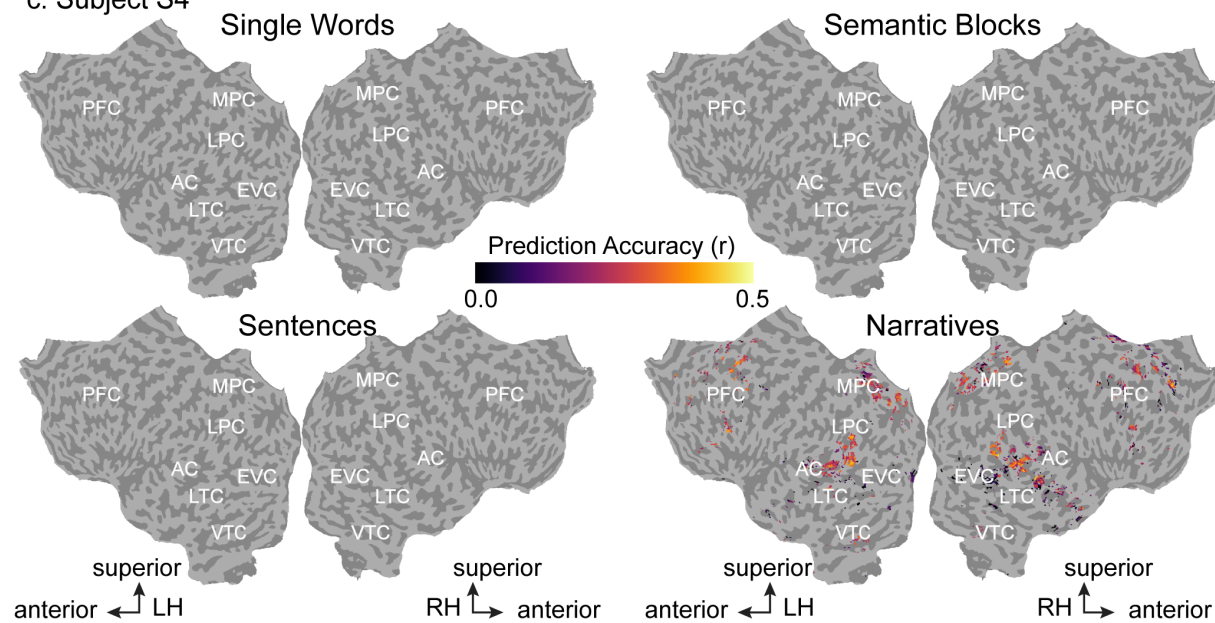

1167 **Figure 4-1. Semantic model prediction accuracy for the four conditions across the cortical**  
1168 **surface for subjects S2, S3, and S4.** Semantic model prediction accuracy in the four conditions is  
1169 shown on the flattened cortical surface of subjects S2, S3 and S4. The format is the same as **Figure**  
1170 **4.** Voxelwise modeling was first used to estimate semantic model weights in the four conditions.  
1171 Semantic model prediction accuracy was then computed as the correlation ( $r$ ) between the subject's  
1172 recorded BOLD activity to the held-out validation story and the BOLD activity predicted by the  
1173 semantic model. In each panel, only voxels with significant semantic model prediction accuracy  
1174 ( $p < 0.05$ , FDR corrected) are shown. Prediction accuracy is given by the color scale in the middle, and  
1175 voxels that have a high prediction accuracy appear yellow. Voxels with semantic model prediction  
1176 accuracies that are not statistically significant are shown in gray. (LH: Left Hemisphere, RH: Right  
1177 Hemisphere) In the Single Words condition, no voxels are significantly predicted in all subjects. In the  
1178 Semantic Blocks condition, scattered voxels in left STS, left angular gyrus, left sPMv, and bilateral  
1179 SFS are significantly predicted in subject S3. In the Sentences condition, voxels in bilateral STS,  
1180 bilateral STG, bilateral angular gyrus, bilateral ventral precuneus, bilateral SFS and SFG, bilateral  
1181 IFG, and bilateral sPMv are significantly predicted in subject S2. In the Narratives condition, voxels in  
1182 bilateral angular gyrus, bilateral ventral precuneus, bilateral SFS and SFG, and right STS are  
1183 significantly predicted in all three subjects. In addition, bilateral STG, left STS, bilateral Broca's area  
1184 and IFG, and bilateral sPMv are significantly predicted in subjects S2 and S3.

1185

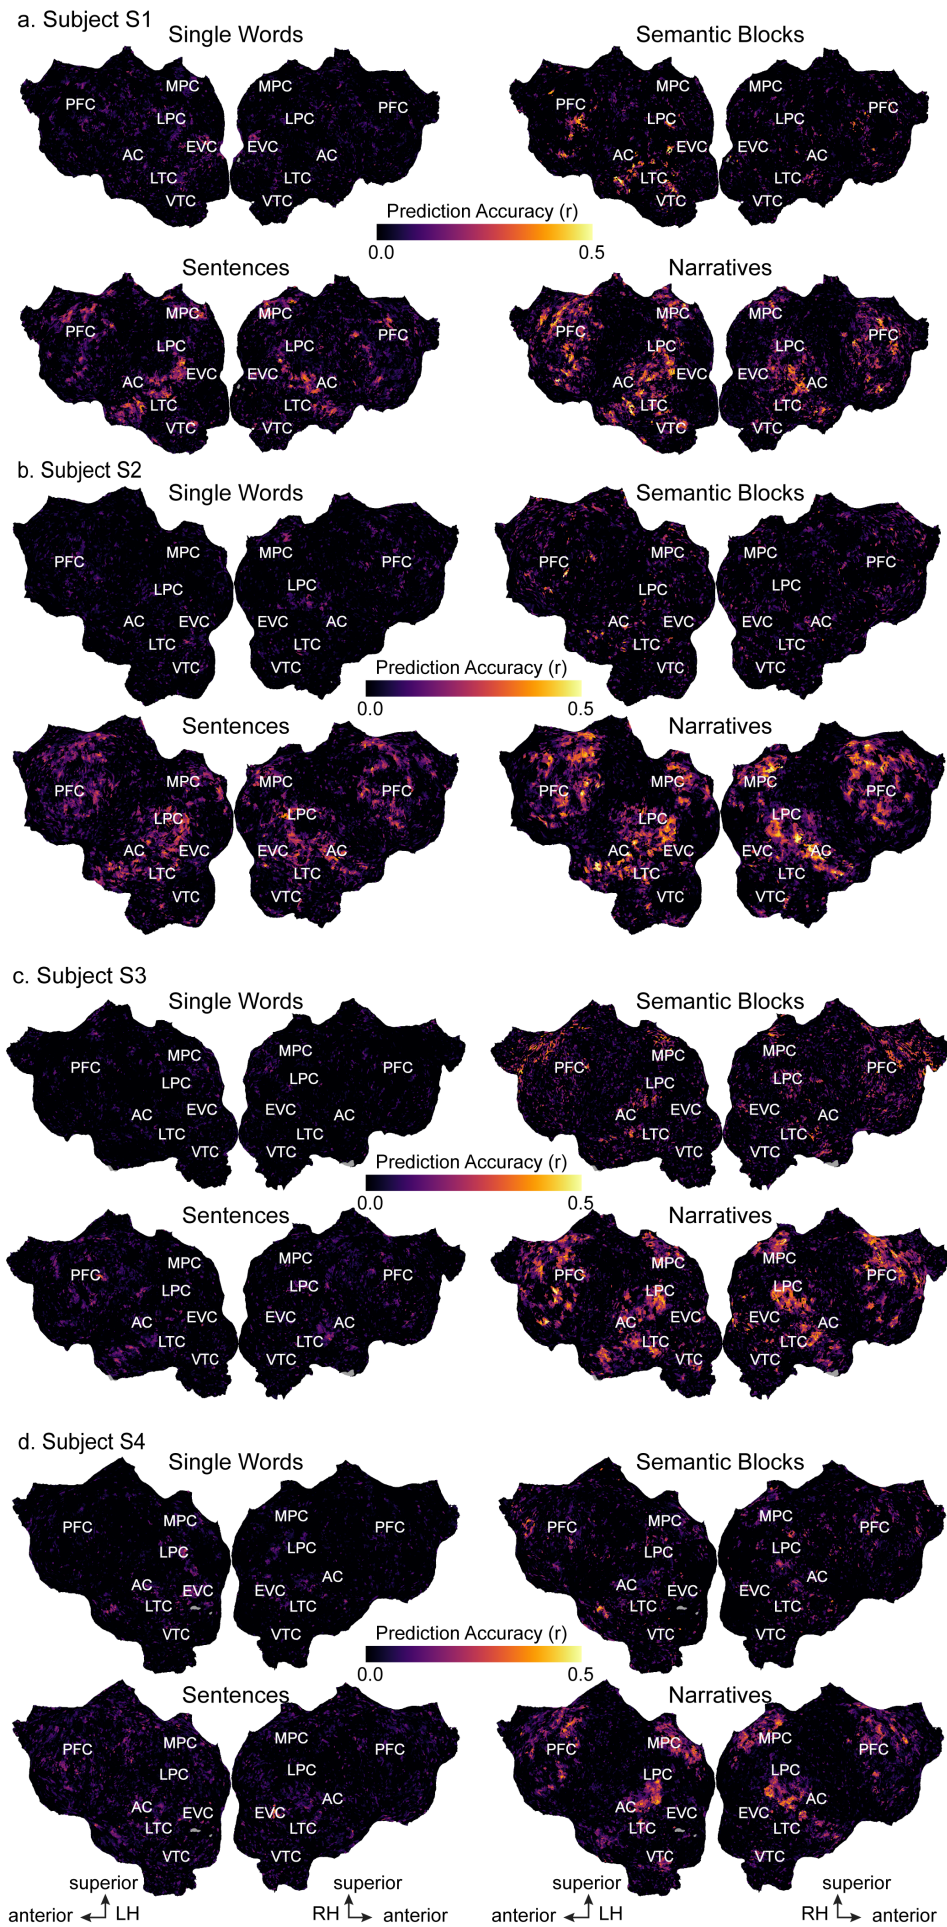

54

54



1186 **Figure 4-2. Un-thresholded semantic model prediction accuracy for the four conditions across**  
1187 **the cortical surface for all subjects.** Un-thresholded semantic model prediction accuracy in the four  
1188 conditions is shown for all subjects on each subject's flattened cortical surface. Voxelwise modeling  
1189 was first used to estimate semantic model weights in the four conditions. Semantic model prediction  
1190 accuracy was then computed as the correlation ( $r$ ) between the subject's recorded BOLD activity to  
1191 the held-out validation story and the BOLD activity predicted by the semantic model. Prediction  
1192 accuracy is given by the color scale in the middle, and voxels that have a high prediction accuracy  
1193 appear yellow. (LH: Left Hemisphere, RH: Right Hemisphere, AC: auditory cortex, EVC: early visual  
1194 cortex, LTC: lateral temporal cortex, VTC: ventral temporal cortex, LPC: lateral parietal cortex, MPC:  
1195 medial parietal cortex, PFC: prefrontal cortex) In the Single Words condition, prediction accuracy is  
1196 high in scattered voxels in primary visual cortex in subjects S1 and S4. In the Semantic Blocks  
1197 condition, prediction accuracy is high in voxels in left STS and left angular gyrus in subjects S1 and  
1198 S3. In addition, prediction accuracy is high in voxels in left Broca's area and IFG in subject S1, and  
1199 prediction accuracy is high in voxels in bilateral SFS, SFG, and ventral precuneus in subject S3. In  
1200 the Sentences condition, prediction accuracy is high in voxels in bilateral angular gyrus, STS, STG,  
1201 MTG, anterior temporal lobe, IFG, sPMv, SFS, SFG, and ventral precuneus in subjects S1 and S2. In  
1202 the Narratives condition, prediction accuracy is high in voxels in bilateral angular gyrus, STS, STG,  
1203 MTG, anterior temporal lobe, Broca's area and IFG, sPMv, SFS, SFG, ventral precuneus, and  
1204 posterior cingulate gyrus in all subjects.

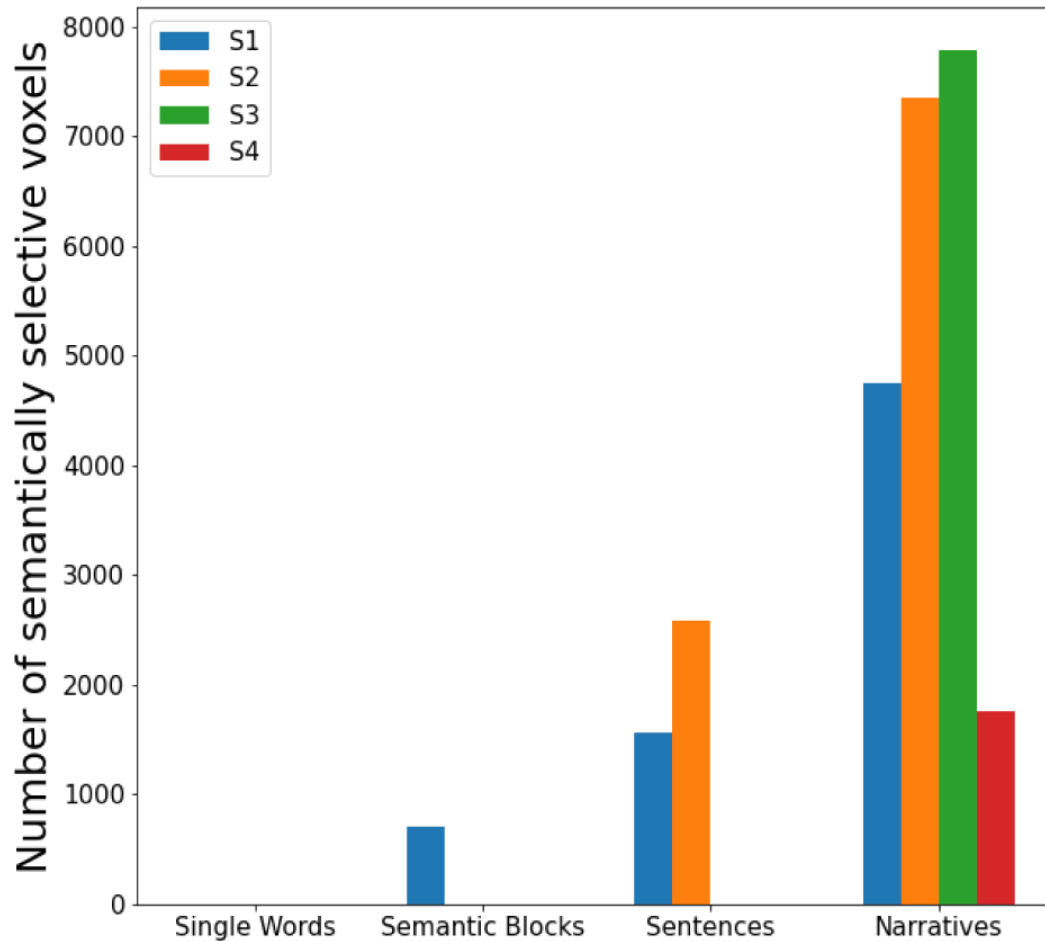

1206 **Figure 4-3. Number of semantically selective voxels for the four conditions for all subjects.**  
1207 The number of semantically selective voxels for each subject is plotted for the four conditions. In the  
1208 Single Words condition, no voxels are semantically selective in any of the four subjects. In the  
1209 Semantic Blocks condition, the number of semantically selective voxels is 708, 0, 0, and 0 for  
1210 subjects 1-4, respectively. In the Sentences condition, the number of semantically selective voxels is  
1211 1566, 2581, 0, and 0 for subjects 1-4, respectively. In the Narratives condition, the number of  
1212 semantically selective voxels is 4745, 7355, 7786, and 1757 for subjects 1-4, respectively.

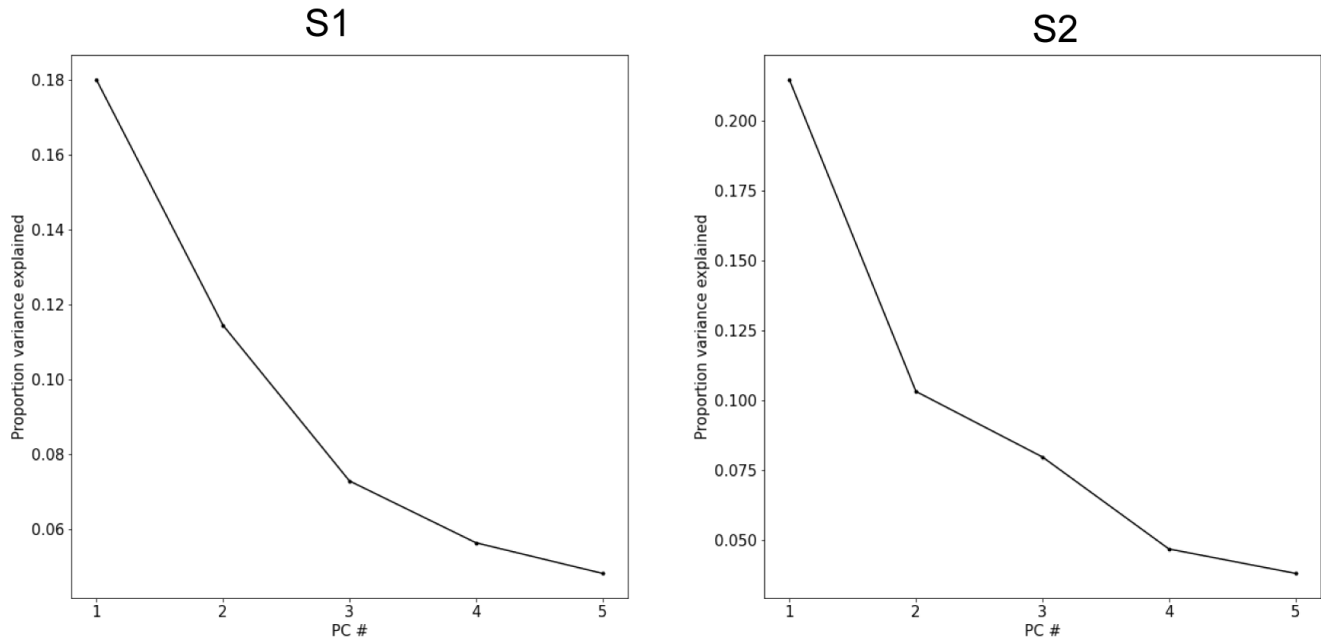

1214 **Figure 8-1. Proportion of variance explained by PCs of semantic difference vectors.** Semantic  
1215 difference vectors were computed by subtracting semantic model weights estimated in the Sentences  
1216 condition from semantic model weights estimated in the Narratives condition. PCA was then applied  
1217 to the difference vectors for each subject separately. The amount of variance explained by each of  
1218 the first five PCs is plotted for each subject. The first five PCs explain 47.1% of the variance in subject  
1219 S1 and 48.2% of the variance in subject S2.



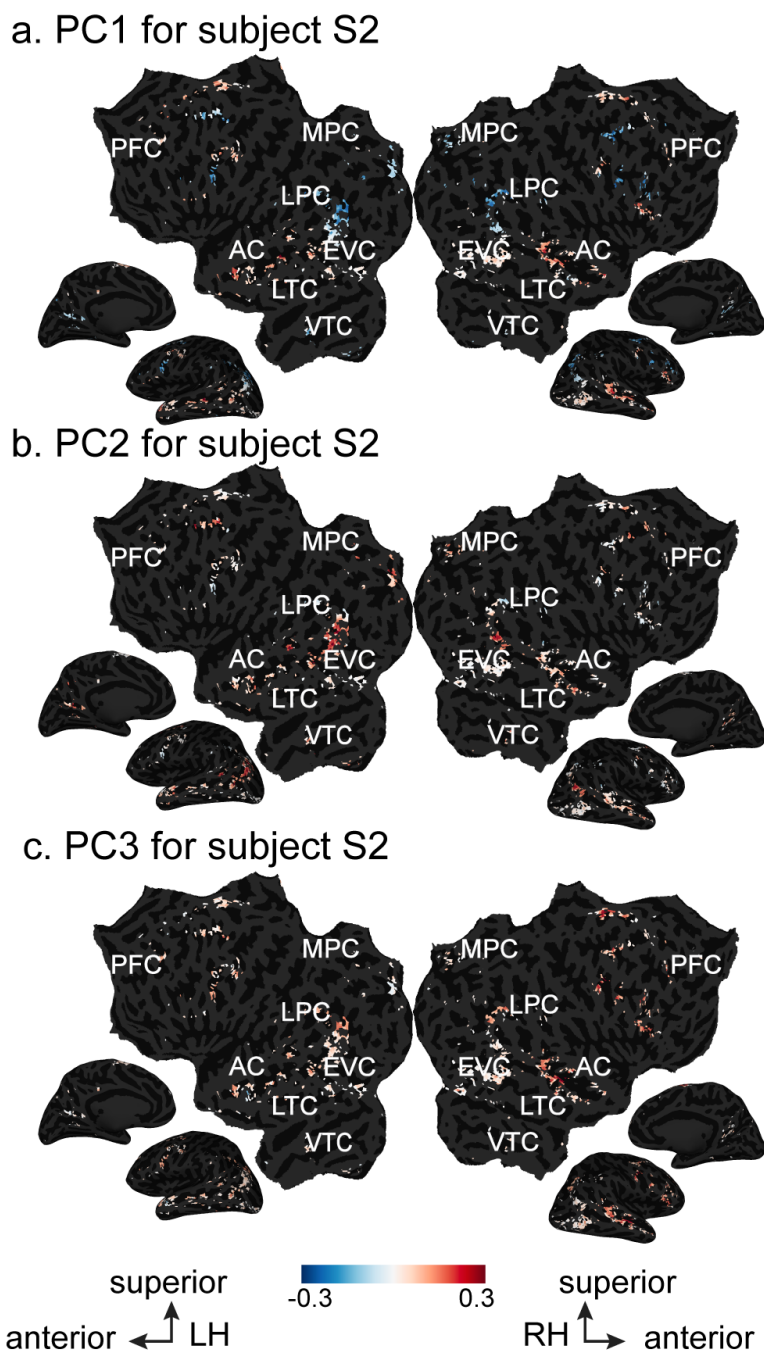

1221 **Figure 8-2. Semantic tuning shifts between the Sentences and Narratives conditions for**  
1222 **subject S2.** Semantic model weights estimated in the Sentences condition were subtracted from  
1223 semantic model weights estimated in the Narratives condition. PCA was then applied to the resulting  
1224 difference vectors for each subject separately. The projection of the difference vectors onto the first  
1225 three PCs is shown on the flattened cortical surface of subject S2. Only voxels that are semantically  
1226 selective in both conditions are shown. Projection value is given by the color scale in the middle.  
1227 Voxels that project positively onto a PC appear red, while voxels that project negatively onto a PC  
1228 appear blue. (LH: Left Hemisphere, RH: Right Hemisphere, AC: auditory cortex, EVC: early visual  
1229 cortex, LTC: lateral temporal cortex, VTC: ventral temporal cortex, LPC: lateral parietal cortex, MPC:  
1230 medial parietal cortex, PFC: prefrontal cortex) **a.** For the first PC, voxels in bilateral STS and bilateral  
1231 SFG have a strong positive projection while voxels in bilateral angular gyrus, bilateral RSC, bilateral

1232 IFG, and bilateral SFS have a strong negative projection. **b.** For the second PC, voxels in bilateral  
1233 angular gyrus, bilateral superior STS, bilateral RSC, and bilateral SFS have a strong positive  
1234 projection while no voxels have a strong negative projection. **c.** For the third PC, voxels in right STS,  
1235 bilateral angular gyrus, right SFS, and right IFG have a strong positive projection while no voxels  
1236 have a strong negative projection.

| Subject | PC | Top 10 most correlated words                                                                                                 | Top 10 least correlated words                                                                                            |
|---------|----|------------------------------------------------------------------------------------------------------------------------------|--------------------------------------------------------------------------------------------------------------------------|
| S1      | 1  | 'appointment', 'interview', 'accused', 'detective', 'interviews', 'inspector.', 'spoke', 'officer', 'secretary', 'detention' | 'propel', 'build', 'upwards', 'diversify', 'allows', 'high', 'float', 'enables', 'market', 'speeds'                      |
|         | 2  | 'contents', 'package', 'processed', 'packages', 'discovery', 'boxes', 'delivery', 'delivered', 'deliver', 'discover'         | 'athletic', 'athletics', 'volleyball', 'soccer', 'scoring', 'tournaments', 'professional', 'players', 'football', 'team' |
|         | 3  | 'meters', 'diameter', 'density', 'mm', 'surface', 'larger', 'boundary', 'ranges', 'large', 'thermal'                         | 'wished', 'wanted', 'fellow', 'wife', 'father', 'sister', 'husband', 'mother', 'asked', 'loved'                          |
| S2      | 1  | 'imagery', 'presence', 'refer', 'portrayed', 'depicted', 'resembles', 'resemblance', 'closely', 'voiced', 'fictional'        | 'month', 'week', 'hours', 'weeks', 'year', 'months', 'hour', 'dollars', 'cents', 'semester'                              |
|         | 2  | 'destination', 'taxi', 'travel', 'mail', 'rental', 'via', 'delivery', 'visit', 'cancel', 'deliver'                           | 'with', 'face', 'against', 'as', 'hands', 'chin', 'hitter', 'his', 'he', 'fingers'                                       |
|         | 3  | 'which', 'by', 'has', 'number', 'according', 'may', 'several', 'citation', 'were', 's'                                       | 'everytime', 'goddamn', 'yea', 'cuz', 'wanna', 'sucks', 'freaking', 'sucked', 'awesome', 'idk'                           |

L237  
L238  
L239  
L240

**Figure 8-3. Most and least correlated words for each PC.** The first three PCs of the difference vectors were correlated with words in the semantic model. The ten most correlated words and the ten least correlated words are shown for each PC for each subject.

a. Cross-condition prediction accuracy (Sentences predicting Narratives)

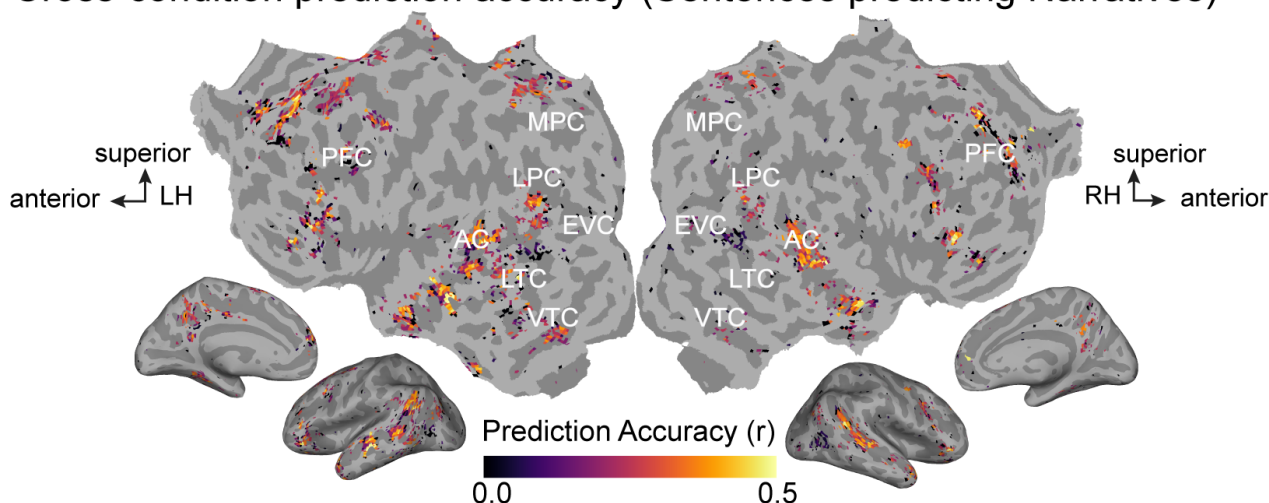

b. Within-condition vs. cross-condition prediction accuracy

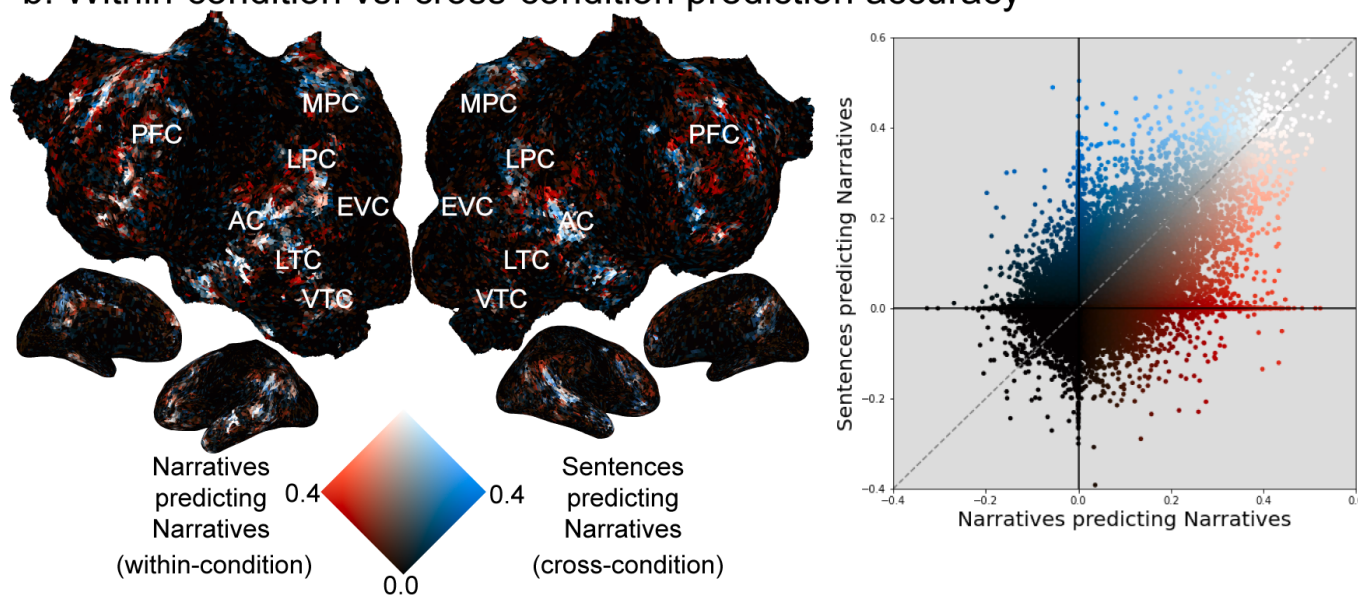

1242 **Figure 9-1. Cross-condition semantic model prediction accuracy for the Sentences and**  
 1243 **Narratives conditions.** a. Semantic model weights estimated in the Sentences condition were used  
 1244 to predict BOLD responses to the held-out validation stimulus in the Narratives condition. The  
 1245 resulting cross-condition semantic model prediction accuracy is shown on the flattened cortical  
 1246 surface of one subject (S1; see Extended Data Figure 9-2 for S2). Only voxels with significant  
 1247 prediction accuracy ( $p < 0.05$ , FDR corrected) are shown. Prediction accuracy is given by the color  
 1248 scale in the middle, and voxels that have a high prediction accuracy appear yellow. Voxels for which  
 1249 the cross-condition semantic model prediction accuracy is not statistically significant are shown in  
 1250 gray. (LH: Left Hemisphere, RH: Right Hemisphere, AC: auditory cortex, EVC: early visual cortex,  
 1251 LTC: lateral temporal cortex, VTC: ventral temporal cortex, LPC: lateral parietal cortex, MPC: medial  
 1252 parietal cortex, PFC: prefrontal cortex) Voxels in bilateral angular gyrus, bilateral STS, portions of  
 1253 TPJ, bilateral sPMv, bilateral ventral precuneus, bilateral SFG, bilateral IFG, and left SFS are  
 1254 significantly predicted. Semantic model weights estimated in the Sentences condition generalize to  
 1255 the Narratives condition in these voxels. b. Same panel as in Figure 9c depicted here for a direct  
 1256 comparison.



a. Single Words predicting Narratives vs. Narratives predicting Narratives

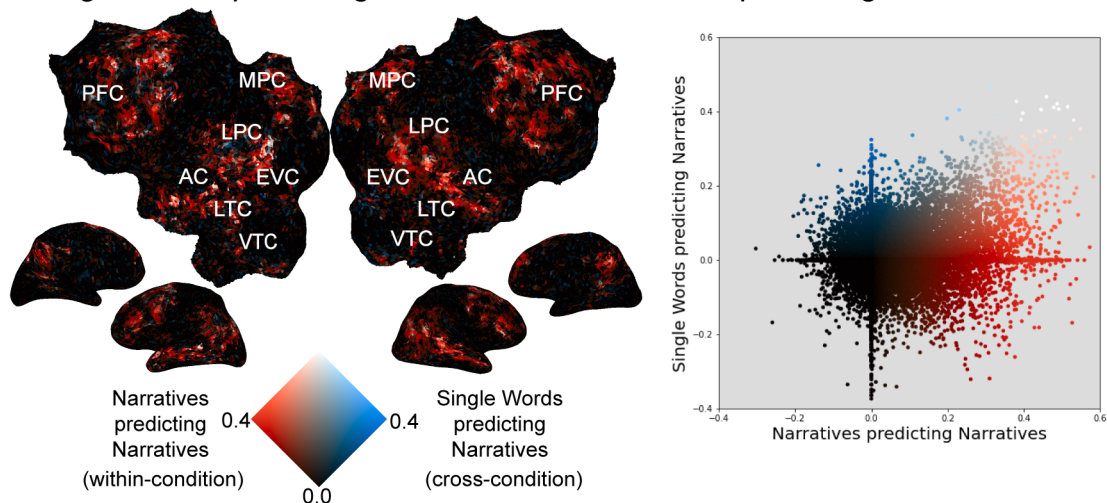

b. Semantic Blocks predicting Narratives vs. Narratives predicting Narratives

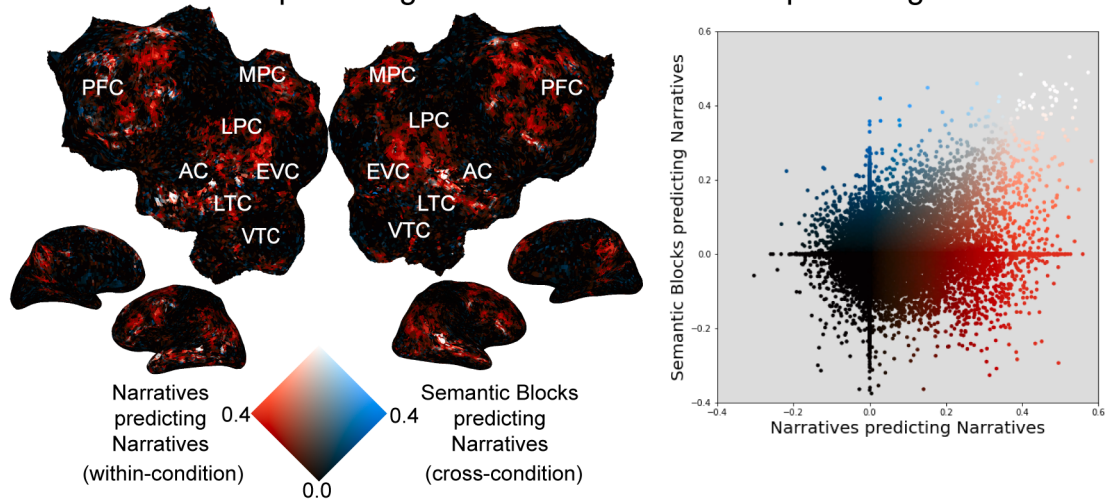

c. Sentences predicting Narratives vs. Narratives predicting Narratives

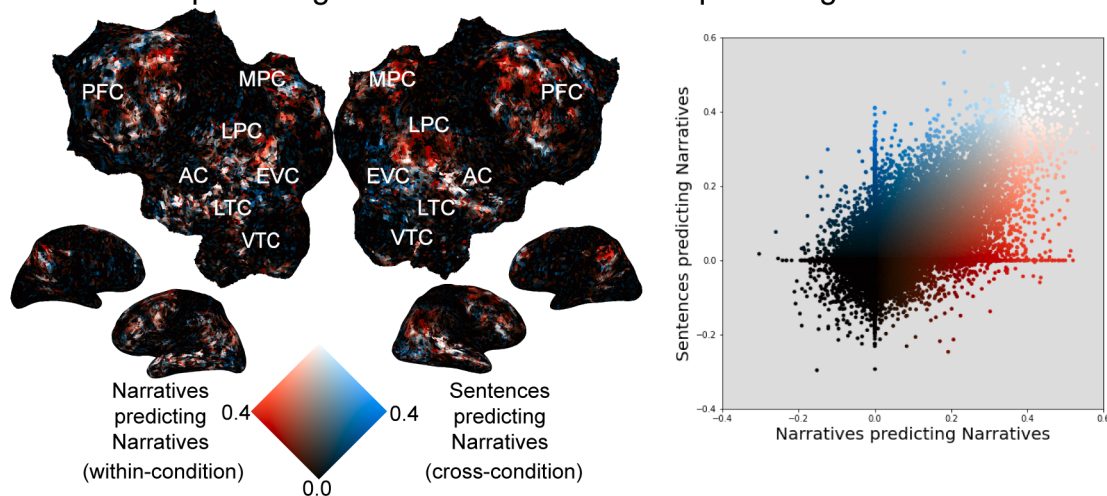

1258 **Figure 9-2. Generalization of semantic model weights estimated in the Single Words, Semantic**  
1259 **Blocks, and Sentences conditions to the Narratives condition for subject S2. a.** Semantic model  
1260 weights estimated in the Single Words condition were used to predict BOLD responses to the held-  
1261 out validation stimulus in the Narratives condition. (left) The resulting cross-condition semantic model  
1262 prediction accuracies are shown with the within-condition Narratives semantic model prediction  
1263 accuracies on the flattened cortical surface of subject S2 with a 2D colormap. (LH: Left Hemisphere,  
1264 RH: Right Hemisphere, AC: auditory cortex, EVC: early visual cortex, LTC: lateral temporal cortex,

1265 VTC: ventral temporal cortex, LPC: lateral parietal cortex, MPC: medial parietal cortex, PFC:  
1266 prefrontal cortex) The axes of the colormap correspond to the cross-condition (blue) and within-  
1267 condition (red) prediction accuracies. Voxels where the within-condition prediction accuracy is high  
1268 and the cross-condition prediction accuracy is low appear red. Voxels where the within-condition  
1269 prediction accuracy is low and the cross-condition prediction accuracy is high appear blue. Voxels  
1270 where both the within-condition prediction accuracy and the cross-condition prediction accuracy are  
1271 high appear white. Finally, voxels where both the within-condition prediction accuracy and the cross-  
1272 condition prediction accuracy are low appear black. In this comparison, many voxels throughout  
1273 bilateral temporal, parietal, and prefrontal cortex are red. In addition, there are a few blue and white  
1274 voxels scattered across the cortical surface. (right) Cross-condition semantic model prediction  
1275 accuracy (y-axis) is plotted against within-condition Narratives semantic model prediction accuracy (x-  
1276 axis) for each cortical voxel. In most voxels, the cross-condition prediction accuracy is worse than the  
1277 Narratives prediction accuracy. **b.** Semantic model weights estimated in the Semantic Blocks  
1278 condition were used to predict BOLD responses to the held-out validation stimulus in the Narratives  
1279 condition. The format is the same as panel a. Many voxels across bilateral temporal, parietal, and  
1280 prefrontal cortex are red. A few voxels located in the left superior temporal sulcus (STS) are white,  
1281 and a few voxels scattered across the cortical surface are blue. In most voxels, the cross-condition  
1282 prediction accuracy is worse than the Narratives prediction accuracy. **c.** Semantic model weights  
1283 estimated in the Sentences condition were used to predict BOLD responses to the held-out validation  
1284 stimulus in the Narratives condition. The format is the same as panel a. Voxels located in left IPL,  
1285 right SFS and bilateral STG are red. Voxels located in bilateral angular gyrus, bilateral STS, portions  
1286 of TPJ, in bilateral sPMv, bilateral SFG, bilateral IFG, and left SFS are white. These cross-condition  
1287 prediction accuracy in these white voxels also reach statistical significance. This suggests that  
1288 semantic model weights estimated in the Sentences condition generalize to the Narratives condition  
1289 in these voxels (See Extended Data Figure 9-3). Scattered voxels located in bilateral precuneus, right  
1290 IFG, and portions of SFS are blue. In many voxels, the cross-condition prediction accuracy is worse  
1291 than the Narratives prediction accuracy. Together, these results show semantic model weights  
1292 estimated in conditions with less context do not generalize well to natural stories.

### a. Cross-condition prediction accuracy (Sentences predicting Narratives)

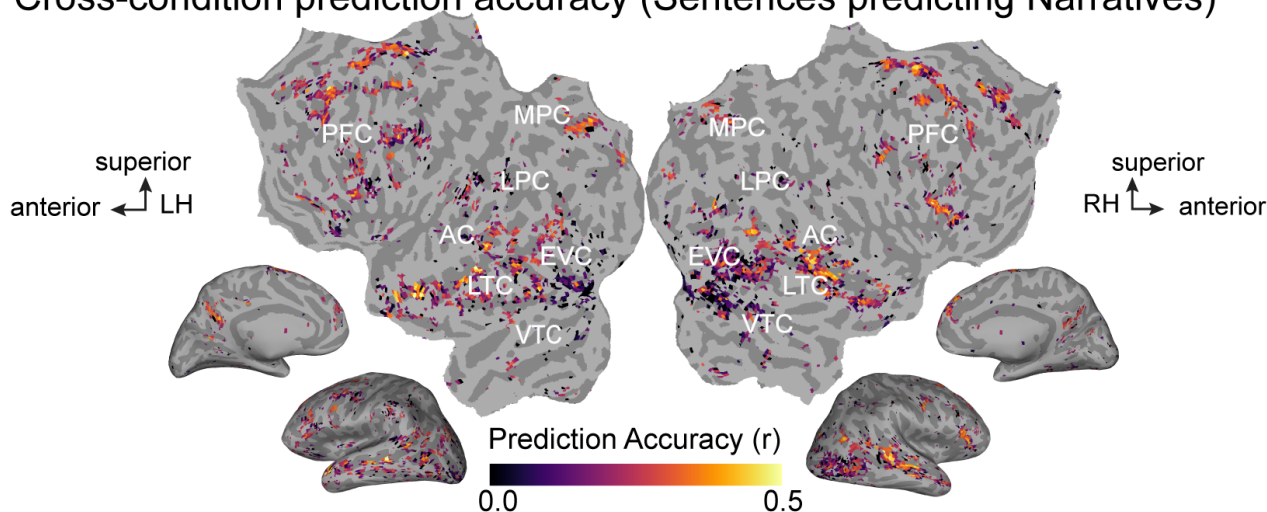

### b. Within-condition vs. cross-condition prediction accuracy

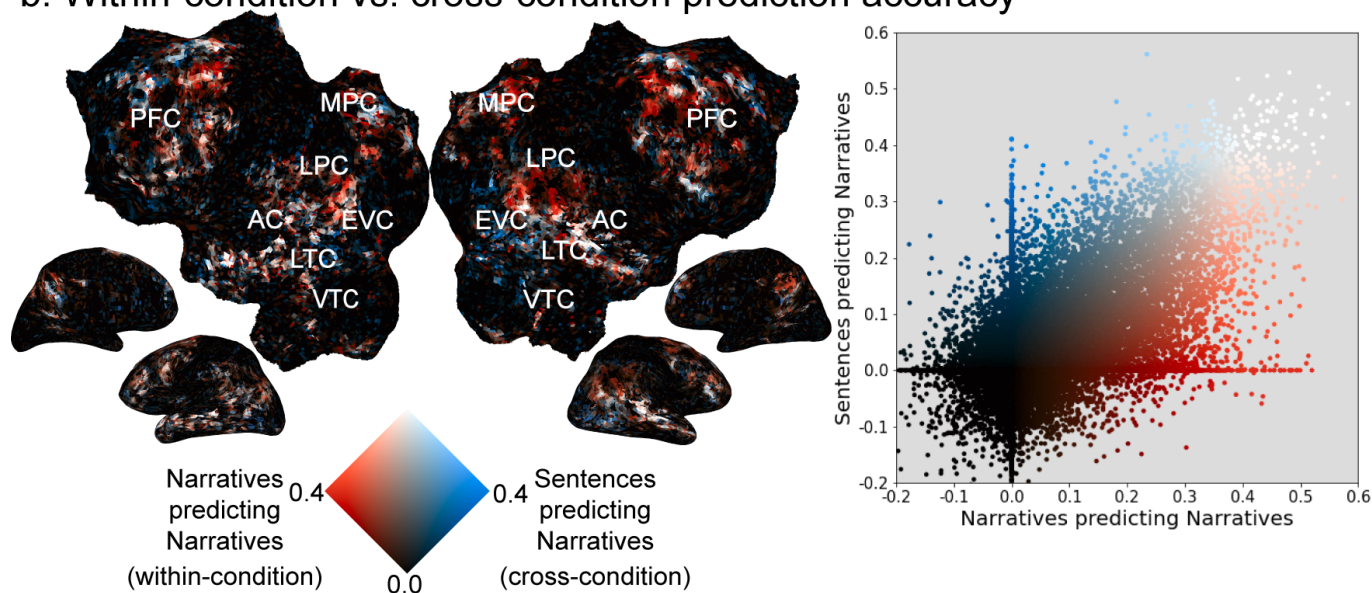

1294 **Figure 9-3. Prediction accuracy of semantic model weights estimated in the Sentences**  
 1295 **condition predicting data in the Narratives condition for subject S2. a.** Semantic model weights  
 1296 estimated in the Sentences condition were used to predict BOLD responses for the held-out  
 1297 validation stimulus in the Narratives condition (cross-condition predictions). The resulting cross-  
 1298 condition semantic model prediction accuracy is shown on the flattened cortical surface of subject S2.  
 1299 Only voxels with significant prediction accuracy are shown ( $p < 0.05$ , FDR corrected). Prediction  
 1300 accuracy is given by the color scale in the middle, and voxels that have a high prediction accuracy  
 1301 appear yellow. Voxels for which the cross-condition semantic model prediction accuracy is not  
 1302 statistically significant are shown in gray. (LH: Left Hemisphere, RH: Right Hemisphere, AC: auditory  
 1303 cortex, EVC: early visual cortex, LTC: lateral temporal cortex, VTC: ventral temporal cortex, LPC:  
 1304 lateral parietal cortex, MPC: medial parietal cortex, PFC: prefrontal cortex) Some voxels in bilateral  
 1305 angular gyrus, bilateral STS, portions of TPJ, in bilateral sPMv, bilateral ventral precuneus, bilateral  
 1306 SFG, bilateral IFG, and left SFS are significantly predicted when estimated semantic model weights in  
 1307 the Sentences condition are used to predict brain responses in the Narratives condition ( $p < 0.05$ , FDR  
 1308 corrected). Sentences condition generalize well to Narratives condition in these voxels. **b.** Same  
 1309 panel as in Extended Data Figure 9-2c depicted here for a direct comparison.
